# Supplementary material for: Z,E-Isomerism in a Series of Substituted Iminophosphonates: Quantum Chemical Research
Source: MDPI journal article supplement (doi:10.3390/org2020008), 2021-04-23
Supplement: s1 [file s1]

# Z,E-isomerism in series of substituted iminophosphonates: quantum chemical research

Alexander B. Rozhenko <sup>1,2,\*</sup>, Andrey A. Kyrylchuk <sup>1</sup>, Yuliia O. Lapinska <sup>2</sup>, Yuliya V. Rassukana <sup>1,2</sup>, Vladimir V. Trachevsky <sup>1,3</sup>, Volodymyr V. Pirozhenko <sup>1</sup>, Jerzy Leszczynski <sup>4</sup> and Petro P. Onysko <sup>1,\*</sup>

<sup>1</sup> Institute of Organic Chemistry of the National Academy of Sciences of Ukraine, Murmans'ka str., 5, 02094, Kyiv, Ukraine;

<sup>2</sup> National Technical University of Ukraine "Kyiv Polytechnic Institute named after Igor Sikorsky", Peremogy ave., 37, Kyiv, Ukraine;

<sup>3</sup> Technical Center of the National Academy of Sciences of Ukraine, Pokrovs'ka str., 13, Kyiv, Ukraine;

<sup>4</sup> Department of Chemistry and Biochemistry, Jackson State University, Jackson, MS, 39217, USA

\* Correspondence: a\_rozhenko@ukr.net; Tel.: +38-044-499-4610 (F.L.)

## Supplementary Materials

|                                                                                                                                                                                                                                                                                                                                                                | Page |
|----------------------------------------------------------------------------------------------------------------------------------------------------------------------------------------------------------------------------------------------------------------------------------------------------------------------------------------------------------------|------|
| <b>Table S1.</b> Calculated (M062X/6-311+G**) total energy values (E), zero point energy correction (ZPE), thermal correction to Gibbs free energy (TCGFE), corrected energy values (E+ZPE and E+TCGFE), relative energy values ( $\Delta E$ and $\Delta G$ ), lowest vibration frequency ( $\nu$ , $\text{cm}^{-1}$ ) and valence angle at nitrogen (degree). | S2   |
| <b>Table S2.</b> Calculated (RI-MP2/cc-pVTZ) total energy values (E(MP2)), zero point energy correction (ZPE, M062X/6-311+G**), thermal correction to Gibbs free energy (TCGFE, M062X/6-311+G**), corrected energy values (E+ZPE and E+TCGFE, without scaling), relative energy values ( $\Delta E$ and $\Delta G$ ).                                          | S4   |
| <b>Table S3.</b> Table S3. Calculated (M062X/6-311+G**) total energy values with taking into account solvent effects (PCM and CPCM methods), zero point energy correction (ZPE, M062X/6-311+G**), and corrected energy values (E+ZPE, without scaling), relative energy values ( $\Delta E$ ).                                                                 | S5   |
| <b>Figure S1.</b> Bond critical points of type (3, -1) and (3, +1) (CPs) for E- and Z-isomers of <b>1-3</b> .                                                                                                                                                                                                                                                  | S8   |
| <b>Figure S2.</b> An illustration of weak C–F $\cdots$ H–C attraction (green) (left) and bond critical points of type (3, -1) and (3, +1) (CPs) (right) for <b>2-TS</b> structure.                                                                                                                                                                             | S11  |
| <b>Figure S3.</b> An illustration of non-covalent interactions for structure <b>1-Z</b> . Gradient isosurfaces ( $s=0.5$ a.u.) are colored on a blue-green-red scale according to the character of interaction, where blue indicates attractive interactions and red indicates strong repulsive interactions.                                                  | S11  |
| Cartesian coordinates for equilibrium (M062X/6-311+G**) structures                                                                                                                                                                                                                                                                                             | S12  |

Table S1. Calculated (M062X/6-311+G\*\*) total energy values (E), zero point energy correction (ZPE), thermal correction to Gibbs free energy (TCGFE), corrected energy values (E+ZPE and E+TCGFE), relative energy values ( $\Delta E$  and  $\Delta G$ ), lowest vibration frequency ( $\nu$ ,  $\text{cm}^{-1}$ ) and valence angle at nitrogen (degree).

| Structure    | E, a.u.      | $\nu(\text{cm}^{-1})$ | ZPE, a.u. | E+ZPE, a.u.  | $\Delta E$ ,<br>kcal/mol <sup>a</sup> | $\Delta E'$ ,<br>kcal/mol <sup>b</sup> | TCGFE, a.u. | E+TCGFE, a.u. | $\Delta G$ ,<br>kJ/mol <sup>a</sup> | $\Delta G'$ ,<br>kJ/mol <sup>b</sup> | $\Delta G^{\text{exp}}$ ,<br>kJ/mol | CNX angle, ° |
|--------------|--------------|-----------------------|-----------|--------------|---------------------------------------|----------------------------------------|-------------|---------------|-------------------------------------|--------------------------------------|-------------------------------------|--------------|
| <b>1-E</b>   | -1117.222366 | 30.7                  | 0.157534  | -1117.064832 | 0.00                                  |                                        | 0.113223    | -1117.109143  | 0.00                                |                                      |                                     | 122.8        |
| <b>1-Z</b>   | -1117.225013 | 15.5                  | 0.157382  | -1117.067631 | -7.35                                 |                                        | 0.112536    | -1117.112477  | -8.75                               |                                      |                                     | 122.0        |
| <b>1-TS</b>  | -1117.187865 | -357.1                | 0.155534  | -1117.032331 | 85.33                                 | 92.68                                  | 0.110333    | -1117.077532  | 83.00                               | 91.75                                |                                     | 179.4        |
| <b>2-E</b>   | -1194.603835 | 29.3                  | 0.192168  | -1194.411667 | 0.00                                  |                                        | 0.145750    | -1194.458085  | 0.00                                |                                      |                                     | 123.5        |
| <b>2-Z</b>   | -1194.606636 | 15.8                  | 0.192130  | -1194.414506 | -7.46                                 |                                        | 0.145486    | -1194.461150  | -8.05                               |                                      | -6.60                               | 124.8        |
| <b>2-TS</b>  | -1194.572366 | -232.8                | 0.190553  | -1194.381813 | 78.38                                 | 85.84                                  | 0.144149    | -1194.428217  | 78.42                               | 86.47                                | 81.90                               | 178.3        |
| <b>3-E</b>   | -819.490432  | 38.5                  | 0.179831  | -819.310601  | 0.00                                  |                                        | 0.138662    | -819.351770   | 0.00                                |                                      |                                     | 118.1        |
| <b>3-Z</b>   | -819.488744  | 30.1                  | 0.179956  | -819.308788  | 4.76                                  |                                        | 0.138734    | -819.350010   | 4.62                                |                                      |                                     | 123.4        |
| <b>3-TS</b>  | -819.449264  | -391.3                | 0.178025  | -819.271239  | 103.35                                | 98.59                                  | 0.136356    | -819.312908   | 102.03                              | 97.41                                |                                     | 178.3        |
| <b>4-E</b>   | -1202.909120 | 16.2                  | 0.286798  | -1202.622322 | 0.00                                  |                                        | 0.236245    | -1202.672875  | -1.87                               |                                      |                                     | 121.5        |
| <b>4-Z</b>   | -1202.911298 | 37.5                  | 0.287125  | -1202.624173 | -4.86                                 |                                        | 0.239080    | -1202.672218  | 1.73                                |                                      |                                     | 123.3        |
| <b>4-TS</b>  | -1202.883872 | -169.3                | 0.285275  | -1202.598597 | 62.57                                 | 67.15                                  | 0.234665    | -1202.649207  | 62.14                               | 60.41                                |                                     | 178.9        |
| <b>5-E</b>   | -1308.929851 | 27.7                  | 0.210278  | -1308.719573 | 6.03                                  |                                        | 0.161237    | -1308.768614  | 6.17                                |                                      |                                     | 124.3        |
| <b>5-Z</b>   | -1308.938594 | 35.4                  | 0.210924  | -1308.727670 | -15.23                                |                                        | 0.164126    | -1308.774468  | -9.20                               |                                      |                                     | 122.6        |
| <b>5-TS</b>  | -1308.905822 | -195.0                | 0.209007  | -1308.696815 | 65.78                                 | 81.01                                  | 0.159351    | -1308.746471  | 58.14                               | 73.51                                | 67.10                               | 179.3        |
| <b>5'-E</b>  | -1308.932209 | 30.9                  | 0.210338  | -1308.721871 | 0.00                                  |                                        | 0.161245    | -1308.770964  | 0.00                                |                                      |                                     | 124.4        |
| <b>5'-Z</b>  | -1308.934293 | 25.7                  | 0.210413  | -1308.723880 | -5.28                                 |                                        | 0.161986    | -1308.772307  | -3.53                               |                                      | -5.40                               | 122.8        |
| <b>5'-TS</b> | -1308.906386 | -182.1                | 0.208975  | -1308.697411 | 64.22                                 | 69.50                                  | 0.159857    | -1308.746529  | 64.15                               | 67.68                                |                                     | 177.0        |
| <b>6-E</b>   | -1401.167848 | 28.8                  | 0.208978  | -1400.958870 | 0.00                                  |                                        | 0.157615    | -1401.010233  | 0.00                                |                                      |                                     | 124.0        |
| <b>6-Z</b>   | -1401.176916 | 41.9                  | 0.209460  | -1400.967456 | -22.54                                |                                        | 0.159958    | -1401.016958  | -17.66                              |                                      |                                     | 122.2        |
| <b>6-TS</b>  | -1401.146145 | -174.1                | 0.207716  | -1400.938429 | 53.67                                 | 76.21                                  | 0.155189    | -1400.990956  | 50.61                               | 68.27                                | 64.60                               | 178.8        |

Table S1 (continued).

| Structure    | E, a.u.      | $\nu(\text{cm}^{-1})$ | ZPE, a.u. | E+ZPE, a.u.  | $\Delta E$ ,<br>kcal/mol <sup>a</sup> | $\Delta E'$ ,<br>kcal/mol <sup>b</sup> | TCGFE, a.u. | E+TCGFE, a.u. | $\Delta G$ ,<br>kJ/mol <sup>a</sup> | $\Delta G'$ ,<br>kJ/mol <sup>b</sup> | $\Delta G^{\text{exp}}$ ,<br>kJ/mol | CNX angle, ° |
|--------------|--------------|-----------------------|-----------|--------------|---------------------------------------|----------------------------------------|-------------|---------------|-------------------------------------|--------------------------------------|-------------------------------------|--------------|
| <b>7-E</b>   | -1423.445109 | 24.6                  | 0.243489  | -1423.201620 | 0.00                                  |                                        | 0.191492    | -1423.253617  | 0.00                                |                                      |                                     | 126.2        |
| <b>7-Z</b>   | -1423.451752 | 42.6                  | 0.243874  | -1423.207878 | -16.43                                |                                        | 0.193954    | -1423.257798  | -10.98                              |                                      |                                     | 122.0        |
| <b>7-TS</b>  | -1423.422303 | -165.3                | 0.241986  | -1423.180317 | 55.93                                 | 72.36                                  | 0.189813    | -1423.232490  | 55.47                               | 66.45                                | 73.40                               | 176.7        |
| <b>8-E</b>   | -1077.926113 | 33.5                  | 0.129853  | -1077.796260 | 0.00                                  |                                        | 0.087551    | -1077.838562  | 0.00                                |                                      |                                     | 111.8        |
| <b>8-Z</b>   | -1077.928907 | 32.6                  | 0.129842  | -1077.799065 | -7.36                                 |                                        | 0.087513    | -1077.841394  | -7.43                               |                                      |                                     | 109.9        |
| <b>8-TS</b>  | -1077.884982 | -1076.2               | 0.127098  | -1077.757884 | 100.76                                | 102.01                                 | 0.084400    | -1077.800582  | 99.72                               | 107.15                               |                                     | 178.4        |
| <b>9-E</b>   | -971.898362  | 27.3                  | 0.206237  | -971.692125  | 0.00                                  |                                        | 0.162892    | -971.735470   | 0.00                                |                                      |                                     | 110.9        |
| <b>9-Z</b>   | -971.905772  | 15.0                  | 0.206369  | -971.699403  | -19.11                                |                                        | 0.162068    | -971.743704   | -21.62                              |                                      |                                     | 110.7        |
| <b>9-TS</b>  | -971.857421  | -1116.4               | 0.203384  | -971.654037  | 100.00                                | 119.11                                 | 0.159306    | -971.698115   | 119.69                              | 98.07                                |                                     | 177.3        |
| <b>10-E</b>  | -1486.575383 | 18.0                  | 0.230943  | -1486.344440 | 0.00                                  |                                        | 0.178973    | -1486.396410  | 0.00                                |                                      |                                     | 136.2        |
| <b>10-Z</b>  | -1486.582232 | 23.6                  | 0.231065  | -1486.351167 | -17.66                                |                                        | 0.179694    | -1486.402538  | -16.09                              |                                      |                                     | 133.9        |
| <b>10-TS</b> | -1486.570108 | -66.3                 | 0.230165  | -1486.339943 | 11.81                                 | 29.47                                  | 0.177435    | -1486.392673  | 9.81                                | 25.90                                |                                     | 176.5        |
| <b>11-E</b>  | -659.516068  | 43.0                  | 0.090732  | -659.425336  | 0.00                                  |                                        | 0.054659    | -659.461409   | 0.00                                |                                      |                                     | 109.9        |
| <b>11-Z</b>  | -659.502198  | 32.3                  | 0.090544  | -659.411654  | 35.92                                 |                                        | 0.054261    | -659.447937   | 35.37                               |                                      |                                     | 111.1        |
| <b>11-TS</b> | -659.474678  | -1069.6               | 0.088190  | -659.386488  | 101.99                                | 66.07                                  | 0.051835    | -659.422843   | 101.25                              | 65.88                                |                                     | 179.7        |
| <b>12-E</b>  | -1068.169115 | 13.5                  | 0.191871  | -1067.977244 | 0.00                                  |                                        | 0.145302    | -1068.023813  | 0.00                                |                                      |                                     | 134.4        |
| <b>12-Z</b>  | -1068.163874 | 20.7                  | 0.191758  | -1067.972116 | 13.47                                 |                                        | 0.145160    | -1068.018714  | 13.39                               |                                      |                                     | 137.5        |
| <b>12-TS</b> | -1068.158721 | -67.2                 | 0.191184  | -1067.967537 | 25.49                                 | 12.02                                  | 0.144145    | -1068.014576  | 24.25                               | 10.86                                |                                     | 179.4        |

<sup>a</sup> Energy values calculated relative to E-isomer. <sup>b</sup> Energy values calculated relative to Z-isomer.

Table S2. Calculated (RI-MP2/cc-pVTZ//M062X/6-311+G\*\*) total energy values (E(MP2)), zero point energy correction (ZPE, M062X/6-311+G\*\*), thermal correction to Gibbs free energy (TCGFE, M062X/6-311+G\*\*), corrected energy values (E+ZPE and E+TCGFE, without scaling) and relative energy values ( $\Delta E$  and  $\Delta G$ ).

| Structure    | E(MP2), a.u. | $\Delta E$ ,<br>kcal/mol <sup>a</sup> | $\Delta E'$ ,<br>kcal/mol <sup>b</sup> | ZPE, a.u. | E+ZPE, a.u.  | $\Delta G$ ,<br>kJ/mol <sup>a</sup> | $\Delta G'$ ,<br>kJ/mol <sup>b</sup> |
|--------------|--------------|---------------------------------------|----------------------------------------|-----------|--------------|-------------------------------------|--------------------------------------|
| <b>5-E</b>   | -1306.907032 |                                       |                                        | 0.161237  | -1306.745795 |                                     | 19.14                                |
| <b>5'-E</b>  | -1306.914332 |                                       |                                        | 0.161245  | -1306.753087 | 0.00                                |                                      |
| <b>5'-Z</b>  | -1306.915601 |                                       |                                        | 0.161986  | -1306.753615 | -1.39 <sup>c</sup>                  |                                      |
| <b>5-Z</b>   | -1306.918473 |                                       |                                        | 0.164126  | -1306.754347 | -3.31 <sup>e</sup>                  |                                      |
| <b>5'-TS</b> | -1306.883271 | 81.55                                 | 84.88                                  | 0.159857  | -1306.723414 | 77.90 <sup>c</sup>                  | 79.29 <sup>d</sup>                   |
| <b>5-TS</b>  | -1306.884837 | 58.27                                 | 88.31                                  | 0.159351  | -1306.725486 | 53.32 <sup>e</sup>                  | 75.77 <sup>f</sup>                   |
| <b>6-E</b>   | -1398.981294 |                                       |                                        | 0.157615  | -1398.823679 | 0.00                                |                                      |
| <b>6-Z</b>   | -1398.988589 |                                       |                                        | 0.159958  | -1398.828631 | -13.00                              |                                      |
| <b>6-TS</b>  | -1398.955950 | 66.54                                 | 85.69                                  | 0.155189  | -1398.800761 | 60.17                               | 73.17                                |
| <b>7-E</b>   | -1421.235817 |                                       |                                        | 0.191492  | -1421.044325 | 0.00                                |                                      |
| <b>7-Z</b>   | -1421.240309 |                                       |                                        | 0.193954  | -1421.046355 | -5.33                               |                                      |
| <b>7-TS</b>  | -1421.207267 | 74.96                                 | 86.75                                  | 0.189813  | -1421.017454 | 70.55                               | 75.88                                |

<sup>a</sup> Energy values calculated relative to E-isomer. <sup>b</sup> Energy values calculated relative to Z-isomer. <sup>c</sup> Relative to 5'-E. <sup>d</sup> Relative to 5'-Z. <sup>e</sup> Relative to 5-E.

<sup>f</sup> Relative to 5-Z.

Table S3. Calculated (M062X/6-311+G\*\*) total energy values with taking into account solvent effects (PCM and CPCM methods), zero point energy correction (ZPE, M062X/6-311+G\*\*), and corrected energy values (E+ZPE, without scaling), relative energy values ( $\Delta E$ ).

| Structure   | Solvent model | toluene      |           |              |                                       | methanol     |           |              |                                       | chloroform   |           |              |                                       |
|-------------|---------------|--------------|-----------|--------------|---------------------------------------|--------------|-----------|--------------|---------------------------------------|--------------|-----------|--------------|---------------------------------------|
|             |               | E, a.u.      | ZPE, a.u. | E+ZPE, a.u.  | $\Delta E^*$ ,<br>kJ/mol <sup>a</sup> | E, a.u.      | ZPE, a.u. | E+ZPE, a.u.  | $\Delta E^*$ ,<br>kJ/mol <sup>a</sup> | E, a.u.      | ZPE, a.u. | E+ZPE, a.u.  | $\Delta E^*$ ,<br>kJ/mol <sup>a</sup> |
| <b>1-E</b>  | PCM           | -1117.227768 | 0.157534  | -1117.070234 | 0.0                                   | -1117.233526 | 0.157534  | -1117.075992 | 0.0                                   | -1117.230538 | 0.157534  | -1117.073004 | 0.0                                   |
|             | CPCM          | -1117.228773 | 0.157534  | -1117.071239 | 0.0                                   | -1117.233692 | 0.157534  | -1117.076158 | 0.0                                   | -1117.231340 | 0.157534  | -1117.073806 | 0.0                                   |
| <b>1-Z</b>  | PCM           | -1117.230178 | 0.157382  | -1117.072796 | -6.7                                  | -1117.235707 | 0.157382  | -1117.078325 | -6.1                                  | -1117.232840 | 0.157382  | -1117.075458 | -6.4                                  |
|             | CPCM          | -1117.231188 | 0.157382  | -1117.073806 | -6.7                                  | -1117.235874 | 0.157382  | -1117.078492 | -6.1                                  | -1117.233644 | 0.157382  | -1117.076262 | -6.4                                  |
| <b>1-TS</b> | PCM           | -1117.193820 | 0.155534  | -1117.038286 | 90.6                                  | -1117.199937 | 0.155534  | -1117.044403 | 89.1                                  | -1117.196773 | 0.155534  | -1117.041239 | 89.8                                  |
|             | CPCM          | -1117.194863 | 0.155534  | -1117.039329 | 90.5                                  | -1117.200113 | 0.155534  | -1117.044579 | 89.0                                  | -1117.197611 | 0.155534  | -1117.042077 | 89.8                                  |
| <b>2-E</b>  | PCM           | -1194.609528 | 0.192168  | -1194.417360 | 0.0                                   | -1194.615699 | 0.192168  | -1194.423531 | 0.0                                   | -1194.612483 | 0.192168  | -1194.420315 | 0.0                                   |
|             | CPCM          | -1194.610625 | 0.192168  | -1194.418457 | 0.0                                   | -1194.615883 | 0.192168  | -1194.423715 | 0.0                                   | -1194.613364 | 0.192168  | -1194.421196 | 0.0                                   |
| <b>2-Z</b>  | PCM           | -1194.610625 | 0.192168  | -1194.418457 | 0.0                                   | -1194.615883 | 0.192168  | -1194.423715 | 0.0                                   | -1194.613364 | 0.192168  | -1194.421196 | 0.0                                   |
|             | CPCM          | -1194.611730 | 0.192130  | -1194.419600 | -5.9                                  | -1194.617225 | 0.192130  | -1194.425095 | -4.1                                  | -1194.614360 | 0.192130  | -1194.422230 | -5.0                                  |
| <b>2-TS</b> | PCM           | -1194.574715 | 0.190553  | -1194.384162 | 75.6                                  | -1194.581474 | 0.190553  | -1194.390921 | 73.1                                  | -1194.577910 | 0.190553  | -1194.387357 | 74.5                                  |
|             | CPCM          | -1194.575954 | 0.190553  | -1194.385401 | 75.3                                  | -1194.581694 | 0.190553  | -1194.391141 | 73.0                                  | -1194.578931 | 0.190553  | -1194.388378 | 74.2                                  |
| <b>3-E</b>  | PCM           | -819.496397  | 0.179831  | -819.316566  | 0.0                                   | -819.5027856 | 0.179831  | -819.322955  | 0.0                                   | -819.499463  | 0.179831  | -819.319632  | 0.0                                   |
|             | CPCM          | -819.497504  | 0.179831  | -819.317673  | 0.0                                   | -819.5029703 | 0.179831  | -819.323139  | 0.0                                   | -819.500350  | 0.179831  | -819.320519  | 0.0                                   |
| <b>3-Z</b>  | PCM           | -819.491362  | 0.179956  | -819.311406  | 13.5                                  | -819.4964601 | 0.179956  | -819.316504  | 16.9                                  | -819.493785  | 0.179956  | -819.313829  | 15.2                                  |
|             | CPCM          | -819.492385  | 0.179956  | -819.312429  | 13.8                                  | -819.4966329 | 0.179956  | -819.316677  | 17.0                                  | -819.494607  | 0.179956  | -819.314651  | 15.4                                  |
| <b>3-TS</b> | PCM           | -819.454656  | 0.178025  | -819.276631  | 91.3                                  | -819.4605502 | 0.178025  | -819.282525  | 89.2                                  | -819.457464  | 0.178025  | -819.279439  | 90.3                                  |
|             | CPCM          | -819.455718  | 0.178025  | -819.277693  | 91.2                                  | -819.4607344 | 0.178025  | -819.282709  | 89.2                                  | -819.458329  | 0.178025  | -819.280304  | 90.2                                  |
| <b>4-E</b>  | PCM           | -1202.916083 | 0.286798  | -1202.629285 | 0.0                                   | -1202.923897 | 0.286798  | -1202.637099 | 0.0                                   | -1202.919737 | 0.286798  | -1202.632939 | 0.0                                   |
|             | CPCM          | -1202.917725 | 0.286798  | -1202.630927 | 0.0                                   | -1202.924185 | 0.286798  | -1202.637387 | 0.0                                   | -1202.921083 | 0.286798  | -1202.634285 | 0.0                                   |
| <b>4-Z</b>  | PCM           | -1202.917132 | 0.287125  | -1202.630007 | -1.9                                  | -1202.923996 | 0.287125  | -1202.636871 | 0.6                                   | -1202.920325 | 0.287125  | -1202.633200 | -0.7                                  |
|             | CPCM          | -1202.918642 | 0.287125  | -1202.631517 | -1.5                                  | -1202.924263 | 0.287125  | -1202.637138 | 0.7                                   | -1202.921568 | 0.287125  | -1202.634443 | -0.4                                  |
| <b>4-TS</b> | PCM           | -1202.888536 | 0.285275  | -1202.603261 | 70.2                                  | -1202.895473 | 0.285275  | -1202.610198 | 70.0                                  | -1202.891806 | 0.285275  | -1202.606531 | 70.0                                  |
|             | CPCM          | -1202.889997 | 0.285275  | -1202.604722 | 70.3                                  | -1202.895725 | 0.285275  | -1202.610450 | 70.1                                  | -1202.892993 | 0.285275  | -1202.607718 | 70.2                                  |

Table S3 (continued).

| Structure    | Solvent model | toluene      |           |              |                                       | methanol     |           |              |                                       | chloroform   |           |              |                                       |
|--------------|---------------|--------------|-----------|--------------|---------------------------------------|--------------|-----------|--------------|---------------------------------------|--------------|-----------|--------------|---------------------------------------|
|              |               | E, a.u.      | ZPE, a.u. | E+ZPE, a.u.  | $\Delta E^*$ ,<br>kJ/mol <sup>a</sup> | E, a.u.      | ZPE, a.u. | E+ZPE, a.u.  | $\Delta E^*$ ,<br>kJ/mol <sup>a</sup> | E, a.u.      | ZPE, a.u. | E+ZPE, a.u.  | $\Delta E^*$ ,<br>kJ/mol <sup>a</sup> |
| <b>5-E</b>   | PCM           | -1308.937982 | 0.210278  | -1308.727704 | 0.0                                   | -1308.944367 | 0.210278  | -1308.734089 | 0.0                                   | -1308.941030 | 0.210278  | -1308.730752 | 0.0                                   |
|              | CPCM          | -1308.939204 | 0.210278  | -1308.728926 | 0.0                                   | -1308.944573 | 0.210278  | -1308.734295 | 0.0                                   | -1308.942012 | 0.210278  | -1308.731734 | 0.0                                   |
| <b>5-Z</b>   | PCM           | -1308.944136 | 0.210338  | -1308.733798 | -16.0                                 | -1308.950256 | 0.210338  | -1308.739918 | -15.3                                 | -1308.947046 | 0.210338  | -1308.736708 | -15.6                                 |
|              | CPCM          | -1308.945304 | 0.210338  | -1308.734966 | -15.9                                 | -1308.950457 | 0.210338  | -1308.740119 | -15.3                                 | -1308.947046 | 0.210338  | -1308.736708 | -13.1                                 |
| <b>5-TS</b>  | PCM           | -1308.911842 | 0.210413  | -1308.701429 | 85.0                                  | -1308.918208 | 0.210413  | -1308.707795 | 84.3                                  | -1308.914884 | 0.210413  | -1308.704471 | 84.6                                  |
|              | CPCM          | -1308.913052 | 0.210413  | -1308.702639 | 84.9                                  | -1308.918412 | 0.210413  | -1308.707999 | 84.3                                  | -1308.915857 | 0.210413  | -1308.705444 | 82.1                                  |
| <b>5'-E</b>  | PCM           | -1308.935898 | 0.210924  | -1308.724974 | 0.0                                   | -1308.942721 | 0.210924  | -1308.731797 | 0.0                                   | -1308.939119 | 0.210924  | -1308.728195 | 0.0                                   |
|              | CPCM          | -1308.937298 | 0.210924  | -1308.726374 | 0.0                                   | -1308.942964 | 0.210924  | -1308.732040 | 0.0                                   | -1308.940259 | 0.210924  | -1308.729335 | 0.0                                   |
| <b>5'-Z</b>  | PCM           | -1308.940422 | 0.208975  | -1308.731447 | -17.0                                 | -1308.947666 | 0.208975  | -1308.738690 | -18.1                                 | -1308.943760 | 0.208975  | -1308.734784 | -17.3                                 |
|              | CPCM          | -1308.942084 | 0.208975  | -1308.733109 | -17.7                                 | -1308.947980 | 0.208975  | -1308.739004 | -18.3                                 | -1308.945162 | 0.208975  | -1308.736187 | -18.0                                 |
| <b>5'-TS</b> | PCM           | -1308.911884 | 0.209007  | -1308.702877 | 75.0                                  | -1308.917871 | 0.209007  | -1308.708864 | 78.3                                  | -1308.914733 | 0.209007  | -1308.705726 | 76.3                                  |
|              | CPCM          | -1308.913040 | 0.209007  | -1308.704033 | 76.3                                  | -1308.918068 | 0.209007  | -1308.709061 | 78.6                                  | -1308.915667 | 0.209007  | -1308.706660 | 77.5                                  |
| <b>6-E</b>   | PCM           | -1401.176150 | 0.208978  | -1400.967172 | 0.0                                   | -1401.185150 | 0.208978  | -1400.976172 | 0.0                                   | -1401.180454 | 0.208978  | -1400.971476 | 0.0                                   |
|              | CPCM          | -1401.177753 | 0.208978  | -1400.968775 | 0.0                                   | -1401.185423 | 0.208978  | -1400.976445 | 0.0                                   | -1401.181750 | 0.208978  | -1400.972772 | 0.0                                   |
| <b>6-Z</b>   | PCM           | -1401.184142 | 0.209460  | -1400.974682 | -19.7                                 | -1401.191791 | 0.209460  | -1400.982331 | -16.2                                 | -1401.187826 | 0.209460  | -1400.978366 | -18.1                                 |
|              | CPCM          | -1401.185468 | 0.209460  | -1400.976008 | -19.0                                 | -1401.192011 | 0.209460  | -1400.982551 | -16.0                                 | -1401.188885 | 0.209460  | -1400.979425 | -17.5                                 |
| <b>6-TS</b>  | PCM           | -1401.154808 | 0.207716  | -1400.947092 | 72.4                                  | -1401.163854 | 0.207716  | -1400.956138 | 68.8                                  | -1401.159168 | 0.207716  | -1400.951452 | 70.7                                  |
|              | CPCM          | -1401.156242 | 0.207716  | -1400.948526 | 72.2                                  | -1401.164098 | 0.207716  | -1400.956382 | 68.7                                  | -1401.160324 | 0.207716  | -1400.952608 | 70.4                                  |
| <b>7-E</b>   | PCM           | -1423.451939 | 0.243489  | -1423.208450 | 0.0                                   | -1423.459423 | 0.243489  | -1423.215934 | 0.0                                   | -1423.455512 | 0.243489  | -1423.212023 | 0.0                                   |
|              | CPCM          | -1423.453330 | 0.243489  | -1423.209841 | 0.0                                   | -1423.459656 | 0.243489  | -1423.216167 | 0.0                                   | -1423.456631 | 0.243489  | -1423.213142 | 0.0                                   |
| <b>7-Z</b>   | PCM           | -1423.457800 | 0.243874  | -1423.213926 | -14.4                                 | -1423.464364 | 0.243874  | -1423.220490 | -12.0                                 | -1423.460926 | 0.243874  | -1423.217052 | -13.2                                 |
|              | CPCM          | -1423.459090 | 0.243874  | -1423.215216 | -14.1                                 | -1423.464581 | 0.243874  | -1423.220707 | -11.9                                 | -1423.461964 | 0.243874  | -1423.218090 | -13.0                                 |
| <b>7-TS</b>  | PCM           | -1423.428933 | 0.241986  | -1423.186947 | 70.8                                  | -1423.435991 | 0.241986  | -1423.194005 | 69.5                                  | -1423.432312 | 0.241986  | -1423.190326 | 70.2                                  |
|              | CPCM          | -1423.430223 | 0.241986  | -1423.188237 | 70.8                                  | -1423.436208 | 0.241986  | -1423.194222 | 69.5                                  | -1423.433350 | 0.241986  | -1423.191364 | 70.2                                  |
| <b>8-E</b>   | PCM           | -1077.931558 | 0.129853  | -1077.801705 | 0.0                                   | -1077.937432 | 0.129853  | -1077.807579 | 0.0                                   | -1077.934364 | 0.129853  | -1077.804511 | 0.0                                   |
|              | CPCM          | -1077.932672 | 0.129853  | -1077.802819 | 0.0                                   | -1077.937619 | 0.129853  | -1077.807766 | 0.0                                   | -1077.935259 | 0.129853  | -1077.805406 | 0.0                                   |
| <b>8-Z</b>   | PCM           | -1077.934254 | 0.129842  | -1077.804412 | -7.1                                  | -1077.939877 | 0.129842  | -1077.810035 | -6.4                                  | -1077.936958 | 0.129842  | -1077.807116 | -6.8                                  |
|              | CPCM          | -1077.935325 | 0.129842  | -1077.805483 | -7.0                                  | -1077.940056 | 0.129842  | -1077.810214 | -6.4                                  | -1077.937814 | 0.129842  | -1077.807972 | -6.7                                  |

Table S3 (continued).

| Structure    | Solvent model | toluene      |           |              |                                       | methanol     |           |              |                                       | chloroform   |           |              |                                       |
|--------------|---------------|--------------|-----------|--------------|---------------------------------------|--------------|-----------|--------------|---------------------------------------|--------------|-----------|--------------|---------------------------------------|
|              |               | E, a.u.      | ZPE, a.u. | E+ZPE, a.u.  | $\Delta E^*$ ,<br>kJ/mol <sup>a</sup> | E, a.u.      | ZPE, a.u. | E+ZPE, a.u.  | $\Delta E^*$ ,<br>kJ/mol <sup>a</sup> | E, a.u.      | ZPE, a.u. | E+ZPE, a.u.  | $\Delta E^*$ ,<br>kJ/mol <sup>a</sup> |
| <b>8-TS</b>  | PCM           | -1077.888879 | 0.127098  | -1077.761781 | 111.9                                 | -1077.895352 | 0.127098  | -1077.768254 | 109.7                                 | -1077.892004 | 0.127098  | -1077.764906 | 110.8                                 |
|              | CPCM          | -1077.890022 | 0.127098  | -1077.762924 | 111.7                                 | -1077.895539 | 0.127098  | -1077.768441 | 109.7                                 | -1077.892910 | 0.127098  | -1077.765812 | 110.7                                 |
| <b>9-E</b>   | PCM           | -971.905622  | 0.206237  | -971.699385  | 0.0                                   | -971.914103  | 0.206237  | -971.707866  | 0.0                                   | -971.909595  | 0.206237  | -971.703358  | 0.0                                   |
|              | CPCM          | -971.907285  | 0.206237  | -971.701048  | 0.0                                   | -971.914400  | 0.206237  | -971.708163  | 0.0                                   | -971.910969  | 0.206237  | -971.704732  | 0.0                                   |
| <b>9-Z</b>   | PCM           | -971.911386  | 0.206467  | -971.704919  | -14.5                                 | -971.917473  | 0.206467  | -971.711006  | -8.2                                  | -971.914293  | 0.206467  | -971.707826  | -11.7                                 |
|              | CPCM          | -971.912540  | 0.206467  | -971.706073  | -13.2                                 | -971.917665  | 0.206467  | -971.711198  | -8.0                                  | -971.915217  | 0.206467  | -971.708750  | -10.5                                 |
| <b>9-TS</b>  | PCM           | -971.864623  | 0.203384  | -971.661239  | 114.7                                 | -971.872955  | 0.203384  | -971.669571  | 108.8                                 | -971.868543  | 0.203384  | -971.665159  | 112.0                                 |
|              | CPCM          | -971.866212  | 0.203384  | -971.662828  | 113.5                                 | -971.873232  | 0.203384  | -971.669848  | 108.6                                 | -971.869843  | 0.203384  | -971.666459  | 111.0                                 |
| <b>10-E</b>  | PCM           | -1486.581050 | 0.230943  | -1486.350107 | 0.0                                   | -1486.587492 | 0.230943  | -1486.356549 | 0.0                                   | -1486.584071 | 0.230943  | -1486.353128 | 0.0                                   |
|              | CPCM          | -1486.582390 | 0.230943  | -1486.351447 | 0.0                                   | -1486.587732 | 0.230943  | -1486.356789 | 0.0                                   | -1486.585176 | 0.230943  | -1486.354233 | 0.0                                   |
| <b>10-Z</b>  | PCM           | -1486.586663 | 0.231065  | -1486.355598 | -14.4                                 | -1486.591795 | 0.231065  | -1486.360730 | -11.0                                 | -1486.589066 | 0.231065  | -1486.358001 | -12.8                                 |
|              | CPCM          | -1486.587795 | 0.231065  | -1486.356730 | -13.9                                 | -1486.591996 | 0.231065  | -1486.360931 | -10.9                                 | -1486.589997 | 0.231065  | -1486.358932 | -12.3                                 |
| <b>10-TS</b> | PCM           | -1486.575644 | 0.230165  | -1486.345479 | 26.6                                  | -1486.581901 | 0.230165  | -1486.351736 | 23.6                                  | -1486.578571 | 0.230165  | -1486.348406 | 25.2                                  |
|              | CPCM          | -1486.576917 | 0.230165  | -1486.346752 | 26.2                                  | -1486.582142 | 0.230165  | -1486.351977 | 23.5                                  | -1486.579643 | 0.230165  | -1486.349478 | 24.8                                  |
| <b>11-E</b>  | PCM           | -659.520468  | 0.090732  | -659.429736  | 0.0                                   | -659.525417  | 0.090732  | -659.434685  | 0.0                                   | -659.522805  | 0.090732  | -659.432073  | 0.0                                   |
|              | CPCM          | -659.521448  | 0.090732  | -659.430716  | 0.0                                   | -659.525589  | 0.090732  | -659.434857  | 0.0                                   | -659.523607  | 0.090732  | -659.432875  | 0.0                                   |
| <b>11-Z</b>  | PCM           | -659.518473  | 0.090544  | -659.427929  | 4.7                                   | -659.523482  | 0.090544  | -659.432938  | 4.6                                   | -659.520806  | 0.090544  | -659.430262  | 4.8                                   |
|              | CPCM          | -659.519642  | 0.090544  | -659.429098  | 4.2                                   | -659.523687  | 0.090544  | -659.433143  | 4.5                                   | -659.521764  | 0.090544  | -659.431220  | 4.3                                   |
| <b>11-TS</b> | PCM           | -659.479422  | 0.088190  | -659.391232  | 96.3                                  | -659.484537  | 0.088190  | -659.396347  | 96.1                                  | -659.481868  | 0.088190  | -659.393678  | 96.1                                  |
|              | CPCM          | -659.480388  | 0.088190  | -659.392198  | 96.9                                  | -659.484699  | 0.088190  | -659.396509  | 96.2                                  | -659.482644  | 0.088190  | -659.394454  | 96.5                                  |
| <b>12-E</b>  | PCM           | -1068.172480 | 0.191871  | -1067.980609 | 0.0                                   | -1068.176286 | 0.191871  | -1067.984415 | 0.0                                   | -1068.174268 | 0.191871  | -1067.982397 | 0.0                                   |
|              | CPCM          | -1068.173311 | 0.191871  | -1067.981440 | 0.0                                   | -1068.176434 | 0.191871  | -1067.984563 | 0.0                                   | -1068.174953 | 0.191871  | -1067.983082 | 0.0                                   |
| <b>12-Z</b>  | PCM           | -1068.167911 | 0.191758  | -1067.976153 | 11.7                                  | -1068.172614 | 0.191758  | -1067.980856 | 9.3                                   | -1068.170093 | 0.191758  | -1067.978335 | 10.7                                  |
|              | CPCM          | -1068.168952 | 0.191758  | -1067.977194 | 11.1                                  | -1068.172806 | 0.191758  | -1067.981048 | 9.2                                   | -1068.170964 | 0.191758  | -1067.979206 | 10.2                                  |
| <b>12-TS</b> | PCM           | -1068.162285 | 0.191184  | -1067.971101 | 13.3                                  | -1068.166338 | 0.191184  | -1067.975154 | 15.0                                  | -1068.164181 | 0.191184  | -1067.972997 | 14.0                                  |
|              | CPCM          | -1068.163149 | 0.191184  | -1067.971965 | 13.7                                  | -1068.166499 | 0.191184  | -1067.975315 | 15.1                                  | -1068.164906 | 0.191184  | -1067.973722 | 14.4                                  |

\*  $\Delta E$  values are given relative to the energy of E-isomer.

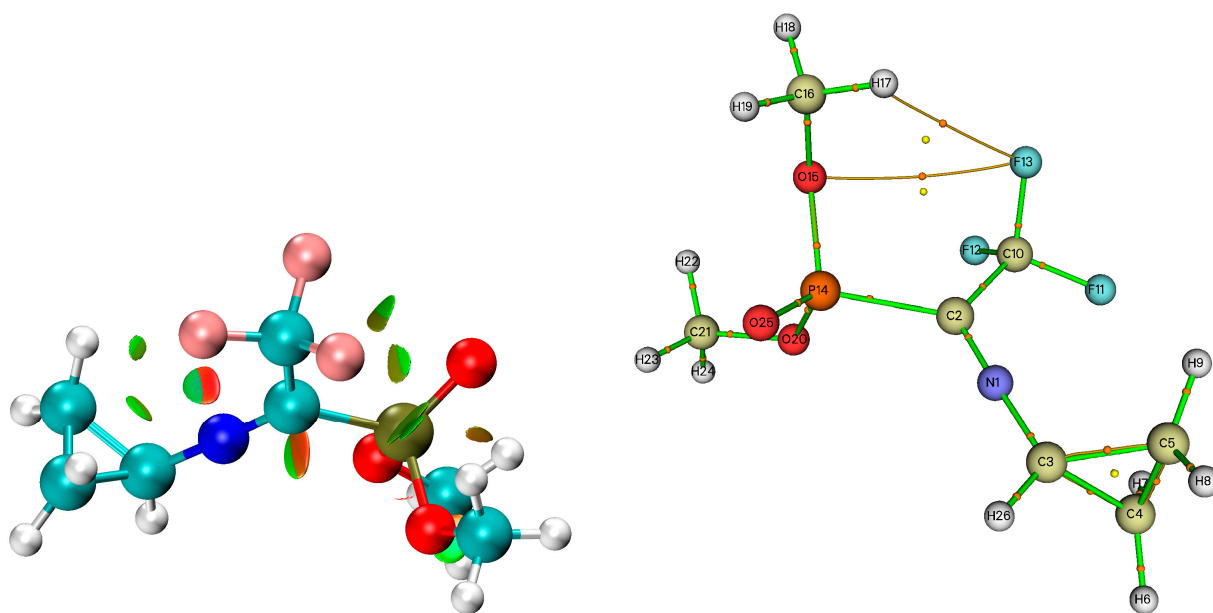

**Figure S1.** An illustration of weak C-F ...H-C attraction (green) (left) and bond critical points of type (3, -1) and (3, +1) (CPs) (right) for **2-TS** structure.

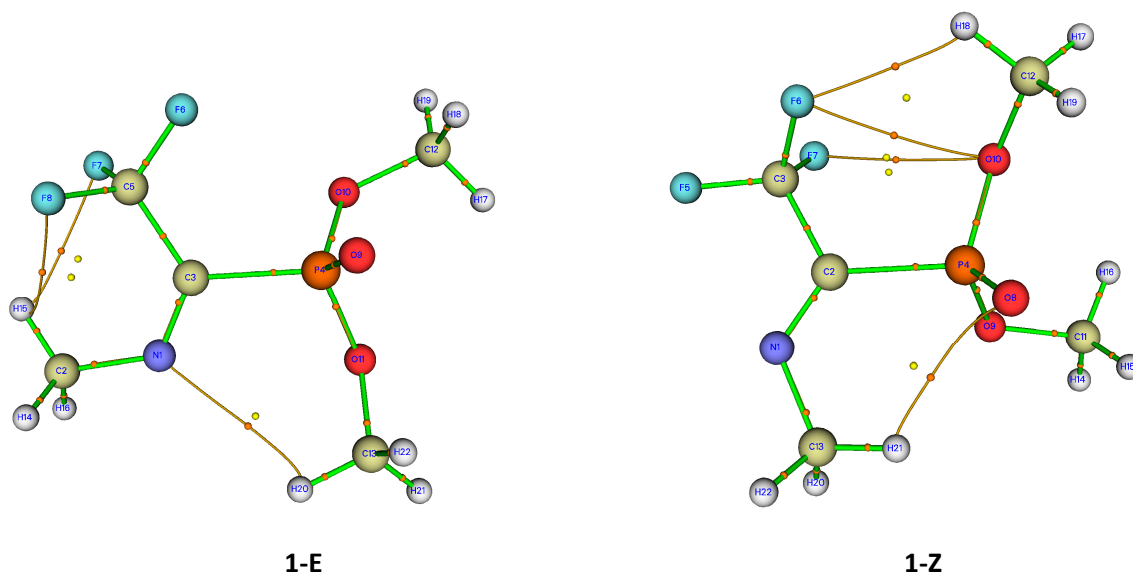



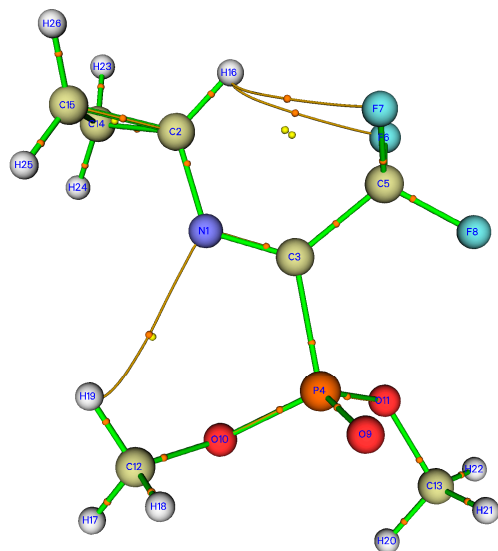

**2-E**

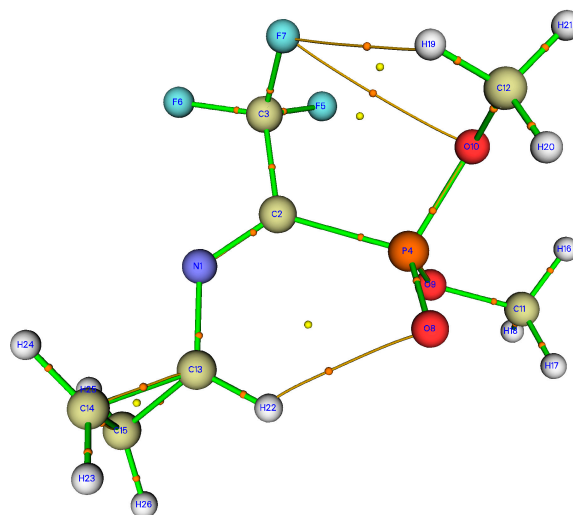

**2-Z**

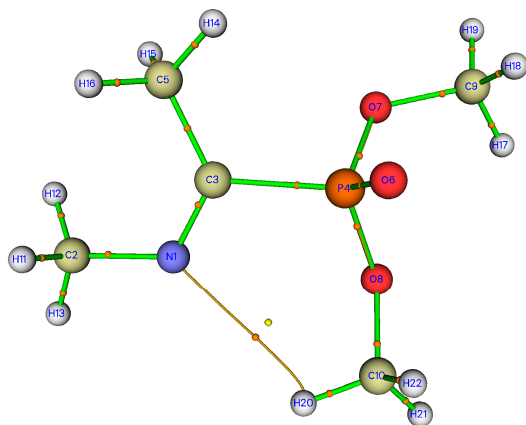

**3-E**

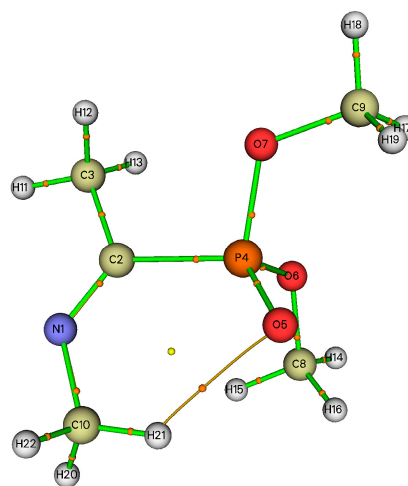

**3-Z**

**Figure S2.** Bond critical points of type (3, -1) and (3, +1) (CPs) for E- and Z-isomers of **1-7**.

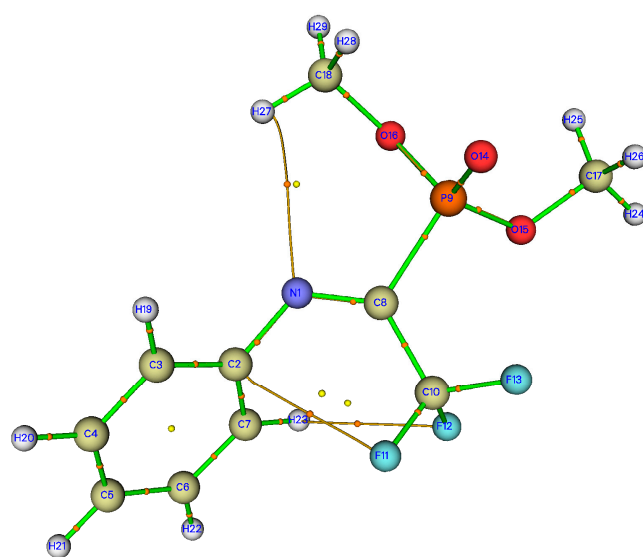

5-E

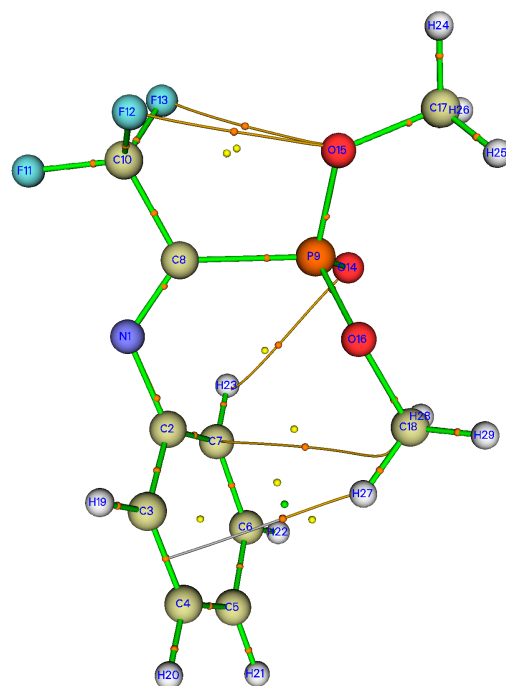

5-Z

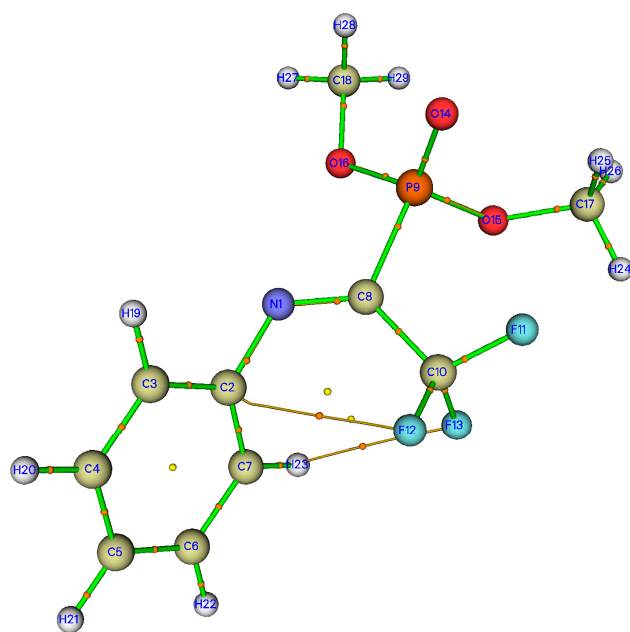

5'-E

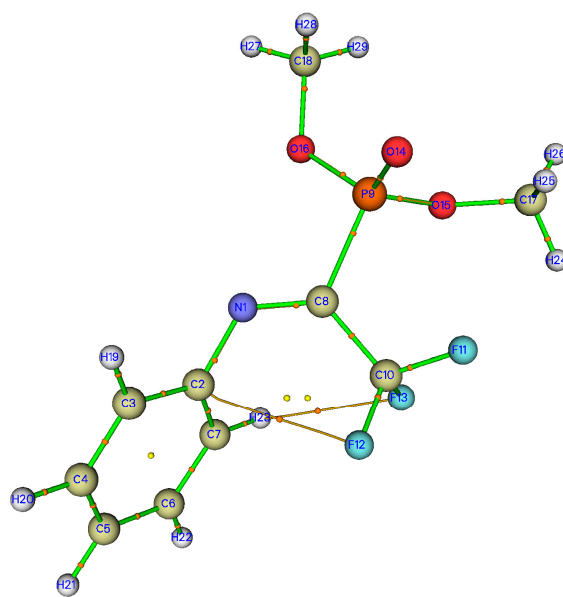

5'-Z

**Figure S2 (continued).** Bond critical points of type (3, -1) and (3, +1) (CPs) for E- and Z-isomers of **1-7**.

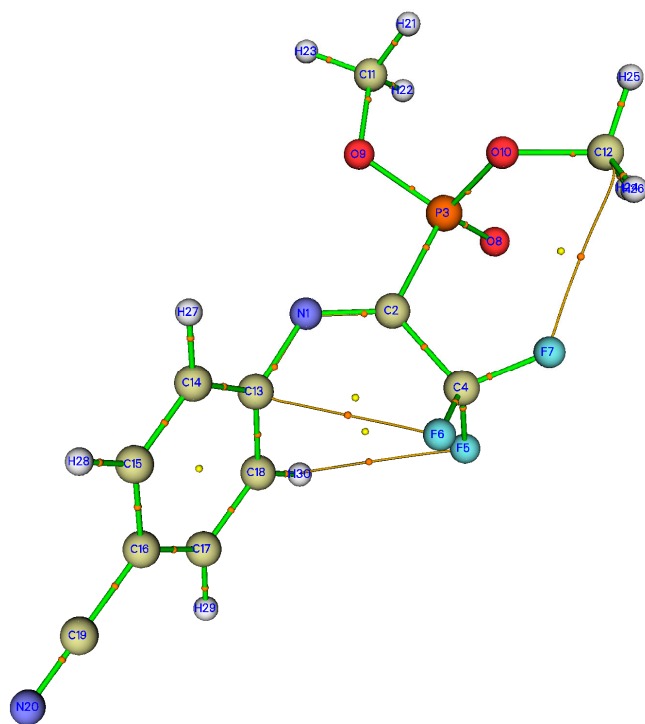

6-E

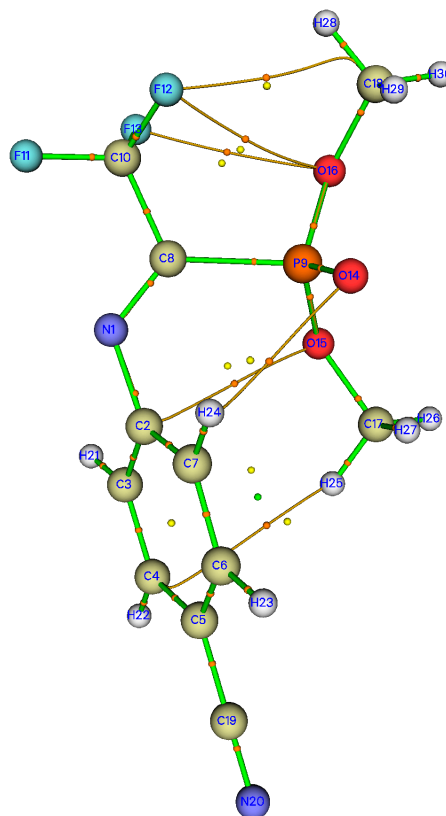

6-Z

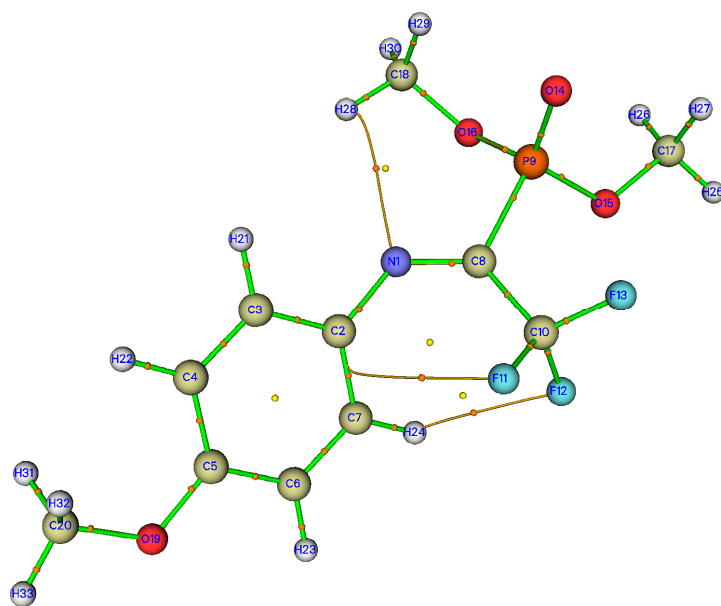

7-E

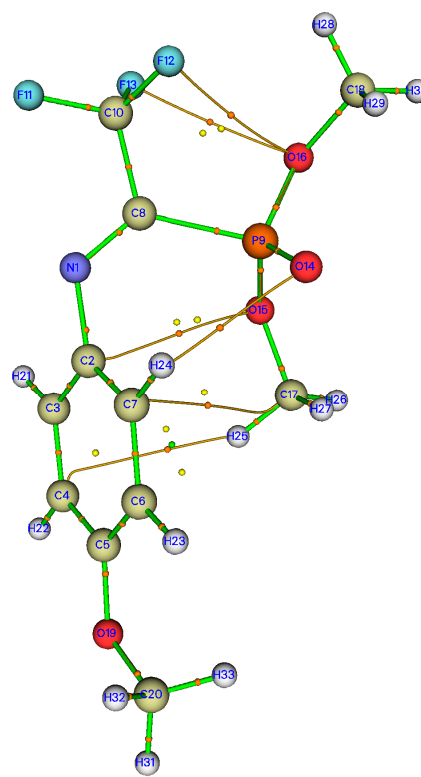

7-Z

**Figure S2 (continued).** Bond critical points of type (3, -1) and (3, +1) (CPs) for E- and Z-isomers of **1-7**.

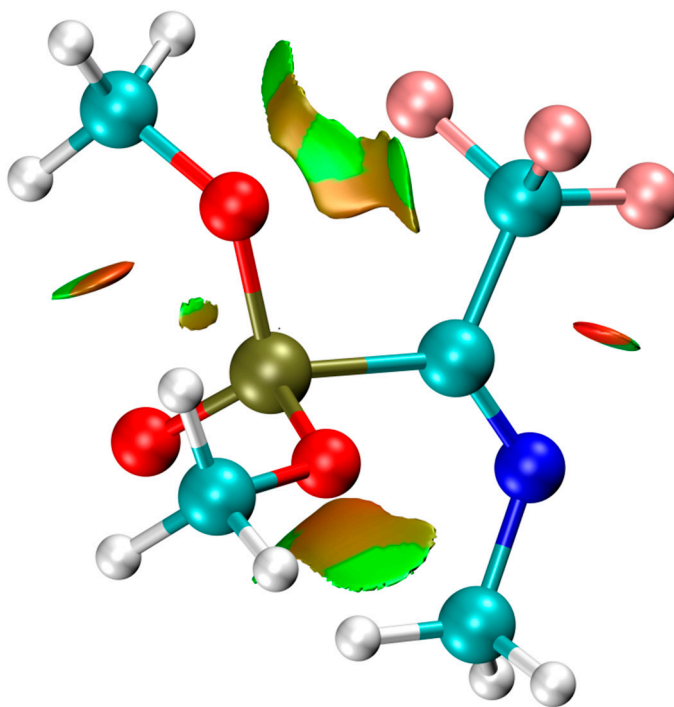

**Figure S3.** An illustration of non-covalent interactions for compound **1-Z**. Gradient isosurfaces ( $s=0.5$  a.u.) are colored on a blue-green-red scale according to the character of interaction, where blue indicates attractive interactions and red indicates strong repulsive interactions.

Cartesian coordinates for equilibrium (M062X/6-311+G\*\*) structures

**1-E**

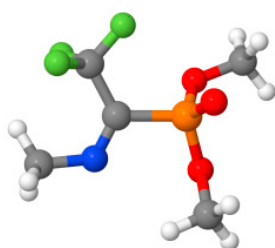

|   |          |          |          |
|---|----------|----------|----------|
| N | 0.92296  | 1.58911  | -0.37930 |
| C | 2.28251  | 2.07011  | -0.56675 |
| C | 0.65725  | 0.39489  | -0.08185 |
| P | -1.10512 | -0.02400 | 0.20617  |
| C | 1.70178  | -0.70353 | 0.13884  |
| F | 1.14246  | -1.82559 | 0.58332  |
| F | 2.34706  | -0.98911 | -1.00030 |
| F | 2.62098  | -0.32599 | 1.03656  |
| O | -1.43485 | -0.27962 | 1.61832  |
| O | -1.30223 | -1.21903 | -0.82116 |
| O | -1.92803 | 1.15346  | -0.47778 |
| C | -2.46749 | -2.05205 | -0.71867 |
| C | -2.21981 | 2.35607  | 0.24998  |
| H | 2.53364  | 2.68178  | 0.30329  |
| H | 3.03973  | 1.29572  | -0.69303 |
| H | 2.27869  | 2.72715  | -1.43648 |
| H | -3.35861 | -1.47696 | -0.97571 |
| H | -2.55313 | -2.45117 | 0.29254  |
| H | -2.32738 | -2.85810 | -1.43374 |
| H | -1.34731 | 3.00878  | 0.22554  |
| H | -3.05697 | 2.82727  | -0.25954 |
| H | -2.49171 | 2.11663  | 1.27908  |

**1-Z**

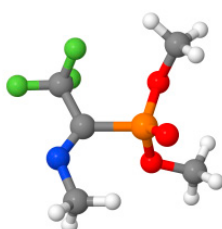

|   |          |          |          |
|---|----------|----------|----------|
| N | -1.05891 | 1.90552  | -0.26592 |
| C | -0.74897 | 0.69977  | -0.10156 |
| C | -1.86639 | -0.26775 | 0.26729  |
| P | 0.94317  | -0.01823 | -0.28036 |
| F | -3.06081 | 0.29944  | 0.25678  |
| F | -1.89020 | -1.29170 | -0.60911 |
| F | -1.66481 | -0.79109 | 1.48180  |
| O | 1.56326  | 0.17553  | -1.60236 |
| O | 1.64587  | 0.68935  | 0.96098  |
| O | 0.84324  | -1.53703 | 0.19190  |

|   |          |          |          |
|---|----------|----------|----------|
| C | 3.01615  | 0.37508  | 1.25589  |
| C | 0.87743  | -2.63008 | -0.74307 |
| C | -0.07340 | 2.91298  | -0.60993 |
| H | 3.31668  | 1.04388  | 2.05764  |
| H | 3.63817  | 0.54111  | 0.37491  |
| H | 3.09276  | -0.66177 | 1.58654  |
| H | 1.36393  | -3.45668 | -0.23083 |
| H | -0.14271 | -2.90198 | -1.00904 |
| H | 1.44081  | -2.34754 | -1.63240 |
| H | 0.05231  | 3.55045  | 0.26826  |
| H | 0.89563  | 2.52354  | -0.92826 |
| H | -0.49813 | 3.53129  | -1.40110 |

### 1-TS

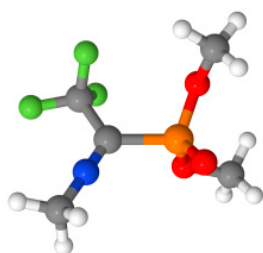

|   |          |          |          |
|---|----------|----------|----------|
| N | 1.49663  | 1.42716  | -0.26329 |
| C | 2.26557  | 2.57201  | -0.53892 |
| C | 0.83806  | 0.42257  | -0.02412 |
| P | -1.01253 | 0.43197  | -0.19384 |
| C | 1.49404  | -0.91433 | 0.38359  |
| F | 0.88283  | -1.46365 | 1.43540  |
| F | 1.42197  | -1.79553 | -0.63026 |
| F | 2.77950  | -0.75147 | 0.68457  |
| O | -1.50298 | 1.44892  | -1.13833 |
| O | -1.46296 | 0.55292  | 1.32740  |
| O | -1.45665 | -1.07220 | -0.53761 |
| C | -2.86121 | 0.53134  | 1.65158  |
| C | -1.53075 | -1.48986 | -1.90750 |
| H | 2.12967  | 3.25910  | 0.30080  |
| H | 3.33356  | 2.35822  | -0.64566 |
| H | 1.88534  | 3.07999  | -1.42943 |
| H | -2.93023 | 0.72791  | 2.71809  |
| H | -3.27667 | -0.45140 | 1.42448  |
| H | -3.38855 | 1.30612  | 1.09276  |
| H | -0.52631 | -1.57839 | -2.32652 |
| H | -2.00959 | -2.46577 | -1.90384 |
| H | -2.11798 | -0.77707 | -2.48696 |

### 2-E

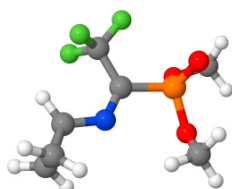

|   |          |          |          |
|---|----------|----------|----------|
| N | 1.22900  | 0.63865  | -0.13495 |
| C | 2.60387  | 0.31192  | -0.21380 |
| C | 0.31678  | -0.21965 | 0.03792  |
| P | -1.39805 | 0.39219  | 0.19448  |
| C | 0.56618  | -1.71687 | 0.20131  |
| F | 1.15250  | -2.22931 | -0.89009 |
| F | 1.37514  | -1.96733 | 1.23991  |
| F | -0.56827 | -2.38233 | 0.40342  |
| O | -1.98465 | 0.21389  | 1.53373  |
| O | -1.34491 | 1.89958  | -0.31911 |
| O | -2.10539 | -0.35742 | -1.01422 |
| C | -1.00979 | 2.95827  | 0.58848  |
| C | -3.53938 | -0.38894 | -1.07944 |
| C | 3.40306  | 1.20759  | -1.13491 |
| C | 3.53111  | 1.37209  | 0.33881  |
| H | 2.91634  | -0.72135 | -0.12514 |
| H | -1.37398 | 3.87783  | 0.13657  |
| H | -1.49261 | 2.79580  | 1.55311  |
| H | 0.07345  | 3.00122  | 0.70591  |
| H | -3.92242 | 0.60788  | -1.30394 |
| H | -3.94830 | -0.74735 | -0.13416 |
| H | -3.79163 | -1.07358 | -1.88459 |
| H | 4.20827  | 0.73350  | -1.67895 |
| H | 2.83479  | 1.94808  | -1.67996 |
| H | 3.05269  | 2.22657  | 0.79664  |
| H | 4.42548  | 1.01380  | 0.82950  |

## 2-Z

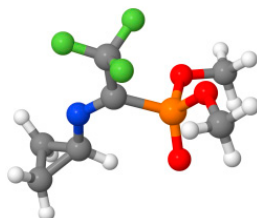

|   |          |          |          |
|---|----------|----------|----------|
| N | -1.71018 | 0.38147  | -0.02246 |
| C | -0.45291 | 0.48542  | -0.06746 |
| C | 0.11073  | 1.87374  | -0.34117 |
| P | 0.77952  | -0.85899 | 0.17273  |
| F | 1.02552  | 1.83569  | -1.31752 |
| F | -0.82468 | 2.74520  | -0.68912 |
| F | 0.72461  | 2.35646  | 0.75704  |
| O | 0.36472  | -1.91611 | 1.11186  |
| O | 1.04519  | -1.27857 | -1.33532 |
| O | 2.14631  | -0.12951 | 0.56272  |
| C | 2.07146  | -2.23949 | -1.63040 |
| C | 2.49610  | 0.05869  | 1.94355  |
| C | -2.39314 | -0.82964 | 0.22181  |
| C | -3.71919 | -0.66070 | 0.93241  |
| C | -3.70526 | -0.95724 | -0.52483 |
| H | 3.04901  | -1.81508 | -1.39868 |
| H | 1.90670  | -3.15375 | -1.05809 |

|   |          |          |          |
|---|----------|----------|----------|
| H | 1.99633  | -2.44642 | -2.69430 |
| H | 1.88403  | 0.85151  | 2.37544  |
| H | 2.35675  | -0.87092 | 2.49525  |
| H | 3.54127  | 0.35659  | 1.95225  |
| H | -1.82401 | -1.72849 | 0.42428  |
| H | -3.98614 | -1.44730 | 1.62451  |
| H | -3.96550 | 0.34601  | 1.23943  |
| H | -3.94198 | -0.15217 | -1.20611 |
| H | -3.96369 | -1.95271 | -0.85873 |

## 2-TS

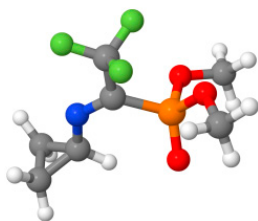

|   |          |          |          |
|---|----------|----------|----------|
| N | 1.21134  | 0.72628  | 0.13769  |
| C | 0.38798  | -0.17352 | -0.06713 |
| C | 2.13858  | 1.69102  | 0.33712  |
| C | 3.40926  | 1.30843  | 1.09005  |
| C | 3.48105  | 1.48023  | -0.37026 |
| H | 3.82154  | 2.08196  | 1.73413  |
| H | 3.42570  | 0.30003  | 1.49531  |
| H | 3.94106  | 2.37170  | -0.78999 |
| H | 3.53220  | 0.58446  | -0.98463 |
| C | 0.85596  | -1.61564 | -0.27977 |
| F | 2.14668  | -1.73655 | 0.04317  |
| F | 0.16665  | -2.49071 | 0.46400  |
| F | 0.71604  | -1.97548 | -1.55592 |
| P | -1.41935 | 0.15073  | -0.24180 |
| O | -2.00936 | 0.37331  | 1.24459  |
| C | -2.62681 | -0.72726 | 1.90617  |
| H | -2.16701 | -1.68170 | 1.63370  |
| H | -2.49198 | -0.56221 | 2.97836  |
| H | -3.69336 | -0.76634 | 1.66090  |
| O | -1.35482 | 1.67225  | -0.73490 |
| C | -2.59526 | 2.37162  | -0.81058 |
| H | -2.95619 | 2.60534  | 0.19733  |
| H | -3.34293 | 1.77317  | -1.34673 |
| H | -2.40693 | 3.29762  | -1.35857 |
| O | -2.16424 | -0.82850 | -1.05775 |
| H | 1.80717  | 2.73006  | 0.43305  |

## 3-E

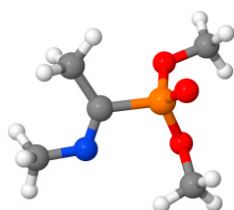



|   |          |          |          |
|---|----------|----------|----------|
| N | 1.91119  | 0.49550  | -0.30972 |
| C | 3.33716  | 0.22491  | -0.43428 |
| C | 1.15254  | -0.45208 | 0.05196  |
| P | -0.60134 | -0.01514 | 0.26748  |
| C | 1.55277  | -1.86807 | 0.38614  |
| O | -1.04344 | 0.02789  | 1.67580  |
| O | -1.30044 | -1.11914 | -0.65315 |
| O | -0.87645 | 1.32155  | -0.55966 |
| C | -2.73201 | -1.17709 | -0.69293 |
| C | -0.61028 | 2.59932  | 0.03455  |
| H | 3.79470  | 0.17906  | 0.55965  |
| H | 3.54142  | -0.71949 | -0.94821 |
| H | 3.80524  | 1.03813  | -0.98562 |
| H | 0.75216  | -2.38451 | 0.91462  |
| H | 1.76224  | -2.41887 | -0.53552 |
| H | 2.45163  | -1.87967 | 1.00554  |
| H | -3.12421 | -0.29429 | -1.20059 |
| H | -3.13412 | -1.23872 | 0.31970  |
| H | -2.98990 | -2.07204 | -1.25348 |
| H | 0.46082  | 2.79663  | -0.00616 |
| H | -1.15266 | 3.33310  | -0.55735 |
| H | -0.96400 | 2.61494  | 1.06670  |

### 3-Z

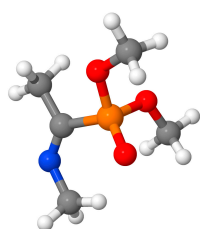

|   |          |          |          |
|---|----------|----------|----------|
| N | -2.49481 | -0.01749 | 0.06572  |
| C | -1.35814 | -0.13771 | 0.60998  |
| C | -1.26314 | -0.45596 | 2.08331  |
| P | 0.28649  | 0.03495  | -0.19535 |
| O | 0.43716  | 0.34755  | -1.63387 |
| O | 0.95114  | 1.13995  | 0.77485  |
| O | 0.93805  | -1.37657 | 0.23336  |
| C | 2.01502  | 1.95645  | 0.27401  |
| C | 2.06804  | -1.86510 | -0.49633 |
| C | -2.67866 | 0.28805  | -1.34323 |
| H | -2.27428 | -0.53109 | 2.48606  |
| H | -0.72943 | -1.39875 | 2.23708  |
| H | -0.70931 | 0.32871  | 2.60786  |
| H | 2.05854  | 2.83760  | 0.91388  |
| H | 1.81947  | 2.24577  | -0.76054 |
| H | 2.96405  | 1.41519  | 0.33343  |
| H | 2.97949  | -1.35909 | -0.16317 |
| H | 2.14403  | -2.92960 | -0.27529 |
| H | 1.92802  | -1.70808 | -1.56799 |
| H | -3.28641 | 1.19612  | -1.40389 |
| H | -1.76056 | 0.41855  | -1.92033 |
| H | -3.27672 | -0.51890 | -1.77803 |

### 3-TS

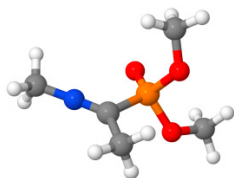

|   |          |          |          |
|---|----------|----------|----------|
| N | -2.19714 | -0.18077 | -0.17040 |
| C | -1.16680 | -0.56007 | 0.38985  |
| C | -1.05915 | -1.46300 | 1.60548  |
| P | 0.45472  | 0.05234  | -0.28340 |
| O | 0.40158  | 0.75558  | -1.57858 |
| O | 1.11298  | 0.94912  | 0.89710  |
| O | 1.37558  | -1.25543 | -0.19430 |
| C | 0.86475  | 2.35721  | 0.90518  |
| C | 2.74649  | -1.16649 | -0.60200 |
| C | -3.39239 | 0.22177  | -0.78842 |
| H | -2.05276 | -1.66668 | 2.00310  |
| H | -0.56994 | -2.39838 | 1.32333  |
| H | -0.43702 | -0.99148 | 2.37080  |
| H | 1.51113  | 2.78301  | 1.66947  |
| H | -0.17985 | 2.55868  | 1.15794  |
| H | 1.09301  | 2.78842  | -0.07009 |
| H | 3.29660  | -0.52222 | 0.08602  |
| H | 3.14709  | -2.17652 | -0.56649 |
| H | 2.81142  | -0.77369 | -1.61814 |
| H | -3.54754 | -0.43212 | -1.65101 |
| H | -4.27246 | 0.13733  | -0.13896 |
| H | -3.31894 | 1.24326  | -1.17642 |

### 4-E

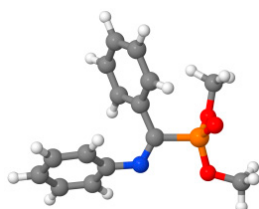

|   |          |          |          |
|---|----------|----------|----------|
| N | 0.48988  | -1.37833 | -0.12157 |
| C | -0.28768 | -0.37716 | -0.15886 |
| P | -2.08793 | -0.69122 | -0.25384 |
| C | 0.06281  | 1.07390  | -0.07172 |
| O | -2.72763 | -0.19094 | -1.48877 |
| O | -2.21738 | -2.23776 | 0.05894  |
| O | -2.68277 | -0.02629 | 1.08363  |
| C | -3.51267 | -2.84722 | -0.01399 |
| C | -3.15091 | 1.32855  | 1.09601  |
| C | 1.89588  | -1.22232 | -0.10839 |
| C | -0.46525 | 1.98372  | -0.99130 |
| C | -0.16889 | 3.33811  | -0.87224 |
| C | 0.63270  | 3.79032  | 0.16984  |
| C | 2.56934  | -0.46023 | -1.06528 |
| C | 3.95628  | -0.39041 | -1.03906 |
| C | 4.67825  | -1.06497 | -0.05851 |

|   |          |          |          |
|---|----------|----------|----------|
| C | 4.00463  | -1.83451 | 0.88553  |
| C | 2.61934  | -1.93276 | 0.84975  |
| C | 1.14765  | 2.88497  | 1.09557  |
| C | 0.86921  | 1.53046  | 0.97409  |
| H | -4.16419 | -2.43274 | 0.75785  |
| H | -3.94956 | -2.68752 | -1.00093 |
| H | -3.35869 | -3.90871 | 0.16133  |
| H | -3.91186 | 1.38888  | 1.87175  |
| H | -3.57986 | 1.58986  | 0.12712  |
| H | -2.32350 | 2.00059  | 1.33319  |
| H | -1.10900 | 1.62774  | -1.78824 |
| H | -0.57046 | 4.03999  | -1.59356 |
| H | 0.85531  | 4.84657  | 0.26469  |
| H | 2.00363  | 0.06413  | -1.82660 |
| H | 4.47524  | 0.19529  | -1.78862 |
| H | 5.75945  | -1.00229 | -0.03923 |
| H | 4.56008  | -2.37465 | 1.64317  |
| H | 2.07940  | -2.54932 | 1.55844  |
| H | 1.76891  | 3.23480  | 1.91129  |
| H | 1.27304  | 0.82107  | 1.68783  |

#### 4-Z

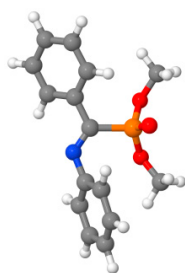

|   |          |          |          |
|---|----------|----------|----------|
| N | 0.39536  | -1.42775 | -0.04142 |
| C | 1.78173  | -1.21762 | 0.07863  |
| C | 2.63961  | -1.69455 | -0.91542 |
| C | 4.01296  | -1.56545 | -0.76133 |
| C | 4.54554  | -0.99858 | 0.39634  |
| C | 3.68962  | -0.54657 | 1.39418  |
| C | 2.31035  | -0.64618 | 1.23915  |
| C | -0.45738 | -0.49000 | 0.00150  |
| P | -0.03375 | 1.31712  | -0.02337 |
| C | -1.90557 | -0.82666 | 0.04857  |
| O | 0.13577  | 1.95505  | 1.29906  |
| O | 1.20130  | 1.38484  | -1.01719 |
| O | -1.21105 | 1.91786  | -0.91784 |
| C | 2.46851  | 1.96569  | -0.67702 |
| C | -2.13629 | 2.90187  | -0.44529 |
| C | -2.77755 | -0.06770 | 0.83120  |
| C | -4.12264 | -0.41028 | 0.90786  |
| C | -4.60504 | -1.50057 | 0.19097  |
| C | -3.73623 | -2.25916 | -0.58941 |
| C | -2.38895 | -1.93007 | -0.65445 |
| H | 2.21520  | -2.15360 | -1.79991 |
| H | 4.67323  | -1.92358 | -1.54246 |
| H | 5.61864  | -0.91958 | 0.52001  |

|   |          |          |          |
|---|----------|----------|----------|
| H | 4.09209  | -0.11136 | 2.30140  |
| H | 1.63820  | -0.29725 | 2.01524  |
| H | 2.62236  | 2.83125  | -1.32029 |
| H | 2.48303  | 2.26617  | 0.37111  |
| H | 3.23319  | 1.21266  | -0.86232 |
| H | -3.13210 | 2.45830  | -0.44732 |
| H | -1.86895 | 3.23000  | 0.56060  |
| H | -2.10324 | 3.74573  | -1.13269 |
| H | -2.39800 | 0.76966  | 1.41005  |
| H | -4.79188 | 0.17106  | 1.53088  |
| H | -5.65523 | -1.76195 | 0.24364  |
| H | -4.11034 | -3.11004 | -1.14606 |
| H | -1.69751 | -2.51711 | -1.24653 |

#### 4-TS

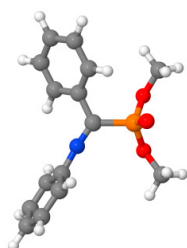

|   |          |          |          |
|---|----------|----------|----------|
| N | -0.86748 | 0.23922  | 0.05669  |
| C | -2.18795 | 0.48658  | -0.01845 |
| C | -2.82389 | 0.58483  | -1.27042 |
| C | -4.18754 | 0.82852  | -1.33044 |
| C | -4.94833 | 0.97248  | -0.17321 |
| C | -4.31608 | 0.86804  | 1.06228  |
| C | -2.95306 | 0.62791  | 1.15492  |
| C | 0.35427  | 0.03297  | 0.12074  |
| P | 0.95340  | -1.73064 | 0.10335  |
| C | 1.37877  | 1.12092  | 0.15720  |
| O | 1.69508  | -2.12753 | 1.31797  |
| O | -0.34668 | -2.57208 | -0.24937 |
| O | 1.74906  | -1.85454 | -1.27278 |
| C | -1.30248 | -2.89435 | 0.77245  |
| C | 3.17897  | -1.95282 | -1.30986 |
| C | 2.65739  | 0.89934  | 0.67338  |
| C | 3.58478  | 1.93689  | 0.68989  |
| C | 3.24443  | 3.18725  | 0.18664  |
| C | 1.96763  | 3.40968  | -0.32673 |
| C | 1.03629  | 2.38235  | -0.33636 |
| H | -2.23602 | 0.46236  | -2.17133 |
| H | -4.66172 | 0.90210  | -2.30248 |
| H | -6.01218 | 1.16095  | -0.23340 |
| H | -4.88979 | 0.97685  | 1.97558  |
| H | -2.46150 | 0.55424  | 2.11712  |
| H | -1.80410 | -3.80273 | 0.44781  |
| H | -0.79684 | -3.07172 | 1.72336  |
| H | -2.02749 | -2.08458 | 0.86606  |
| H | 3.60502  | -0.95601 | -1.43397 |
| H | 3.55473  | -2.41164 | -0.39446 |

|   |         |          |          |
|---|---------|----------|----------|
| H | 3.42596 | -2.57255 | -2.16889 |
| H | 2.91486 | -0.06708 | 1.09418  |
| H | 4.57143 | 1.76816  | 1.10428  |
| H | 3.97071 | 3.99134  | 0.19686  |
| H | 1.70196 | 4.38417  | -0.71839 |
| H | 0.03750 | 2.54095  | -0.72824 |

# 5-E

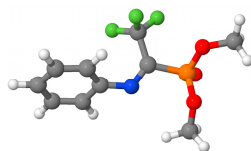

|   |          |          |          |
|---|----------|----------|----------|
| N | -0.57351 | 0.80967  | -0.04615 |
| C | -1.96980 | 0.58741  | -0.11733 |
| C | -2.79151 | 1.31315  | 0.74393  |
| C | -4.16791 | 1.14789  | 0.67694  |
| C | -4.72906 | 0.30250  | -0.27655 |
| C | -3.90480 | -0.38498 | -1.16059 |
| C | -2.52377 | -0.25157 | -1.08363 |
| C | 0.28342  | -0.10141 | 0.11657  |
| P | 2.03674  | 0.44374  | 0.16414  |
| C | -0.00358 | -1.58624 | 0.37534  |
| F | -1.11038 | -1.77008 | 1.09252  |
| F | -0.13691 | -2.26023 | -0.77376 |
| F | 1.00910  | -2.13282 | 1.05014  |
| O | 2.58544  | 0.61846  | 1.51836  |
| O | 2.69651  | -0.66088 | -0.76557 |
| O | 2.08462  | 1.74385  | -0.75242 |
| C | 4.12708  | -0.77105 | -0.83008 |
| C | 1.85039  | 3.04629  | -0.19316 |
| H | -2.33983 | 1.98253  | 1.46583  |
| H | -4.80545 | 1.69260  | 1.36273  |
| H | -5.80435 | 0.18815  | -0.33569 |
| H | -4.33555 | -1.03263 | -1.91456 |
| H | -1.87691 | -0.77969 | -1.77359 |
| H | 4.33681  | -1.67176 | -1.40024 |
| H | 4.54230  | 0.09931  | -1.34048 |
| H | 4.53999  | -0.85433 | 0.17579  |
| H | 0.77689  | 3.22780  | -0.15228 |
| H | 2.28858  | 3.11153  | 0.80352  |
| H | 2.32933  | 3.75757  | -0.86178 |

# 5-Z

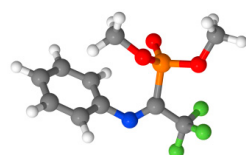

|   |          |          |          |
|---|----------|----------|----------|
| N | -0.32002 | -1.53739 | -0.07240 |
| C | -1.62599 | -1.00551 | 0.00891  |
| C | -2.49853 | -1.22551 | -1.05859 |
| C | -3.80388 | -0.76076 | -0.98132 |

|   |          |          |          |
|---|----------|----------|----------|
| C | -4.25670 | -0.11896 | 0.17088  |
| C | -3.39141 | 0.06512  | 1.24302  |
| C | -2.07136 | -0.36935 | 1.16823  |
| C | 0.71086  | -0.82360 | 0.03932  |
| P | 0.74149  | 1.02088  | 0.21169  |
| C | 2.05389  | -1.55736 | 0.01692  |
| F | 1.90294  | -2.86390 | 0.19046  |
| F | 2.68562  | -1.37096 | -1.14516 |
| F | 2.84432  | -1.10218 | 0.99682  |
| O | 0.44603  | 1.55535  | 1.55193  |
| O | 2.19329  | 1.28655  | -0.37082 |
| O | -0.22095 | 1.54121  | -0.94589 |
| C | 2.73818  | 2.61328  | -0.34065 |
| C | -1.44354 | 2.25666  | -0.69821 |
| H | -2.13805 | -1.75086 | -1.93438 |
| H | -4.47631 | -0.91618 | -1.81645 |
| H | -5.28227 | 0.22350  | 0.23412  |
| H | -3.73857 | 0.55113  | 2.14692  |
| H | -1.39220 | -0.22556 | 2.00014  |
| H | 3.76568  | 2.52723  | -0.68268 |
| H | 2.17464  | 3.26032  | -1.01553 |
| H | 2.70940  | 3.00616  | 0.67633  |
| H | -2.27844 | 1.62265  | -0.99390 |
| H | -1.52278 | 2.51901  | 0.35682  |
| H | -1.41538 | 3.15550  | -1.31182 |

## 5-TS

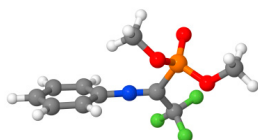

|   |          |          |          |
|---|----------|----------|----------|
| N | -0.74767 | 0.35866  | -0.00201 |
| C | -2.08582 | 0.13436  | -0.04996 |
| C | -2.62407 | -0.63832 | -1.09059 |
| C | -3.99355 | -0.85571 | -1.13877 |
| C | -4.82958 | -0.36226 | -0.14139 |
| C | -4.28334 | 0.37999  | 0.90195  |
| C | -2.92435 | 0.65454  | 0.94643  |
| C | 0.46310  | 0.57481  | 0.03527  |
| P | 1.64569  | -0.82013 | 0.32964  |
| C | 1.03120  | 1.99891  | -0.11137 |
| F | 2.08396  | 2.17159  | 0.69185  |
| F | 1.43028  | 2.21813  | -1.36692 |
| F | 0.11388  | 2.91243  | 0.19481  |
| O | 2.00928  | -1.04016 | 1.73894  |
| O | 0.91996  | -2.05890 | -0.37059 |
| O | 2.80945  | -0.45920 | -0.68571 |
| C | 0.03709  | -2.90610 | 0.38397  |
| C | 4.05976  | -1.16562 | -0.62257 |
| H | -1.96108 | -1.03876 | -1.84786 |
| H | -4.40656 | -1.43383 | -1.95689 |
| H | -5.89450 | -0.55281 | -0.17725 |

|   |          |          |          |
|---|----------|----------|----------|
| H | -4.92428 | 0.77075  | 1.68329  |
| H | -2.49589 | 1.25564  | 1.73816  |
| H | -0.95820 | -2.45879 | 0.41897  |
| H | 0.42445  | -3.04949 | 1.39310  |
| H | -0.00284 | -3.85606 | -0.14360 |
| H | 4.73436  | -0.64790 | -1.29861 |
| H | 4.44962  | -1.14214 | 0.39543  |
| H | 3.91806  | -2.19603 | -0.95190 |

# 5'-E

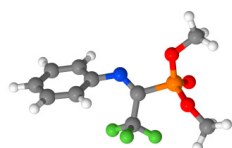

|   |          |          |          |
|---|----------|----------|----------|
| N | -0.66554 | 0.91649  | 0.08336  |
| C | -2.05369 | 0.67081  | -0.01674 |
| C | -2.89181 | 1.28730  | 0.91194  |
| C | -4.26399 | 1.09927  | 0.82528  |
| C | -4.80667 | 0.34501  | -0.21188 |
| C | -3.96773 | -0.22813 | -1.16138 |
| C | -2.59000 | -0.07434 | -1.06701 |
| C | 0.21460  | 0.01707  | 0.12507  |
| P | 1.97822  | 0.53283  | 0.20814  |
| C | -0.03393 | -1.49455 | 0.20169  |
| F | 0.99679  | -2.08401 | 0.82735  |
| F | -1.13549 | -1.80324 | 0.87655  |
| F | -0.12137 | -2.04279 | -1.01651 |
| O | 2.55044  | 0.62427  | 1.56128  |
| O | 2.72139  | -0.50072 | -0.75947 |
| O | 1.92334  | 1.86438  | -0.64768 |
| C | 3.62461  | -1.50613 | -0.27180 |
| C | 3.06470  | 2.73340  | -0.64427 |
| H | -2.45371 | 1.89231  | 1.69609  |
| H | -4.91361 | 1.55777  | 1.56099  |
| H | -5.87930 | 0.21508  | -0.28571 |
| H | -4.38448 | -0.80107 | -1.98088 |
| H | -1.93248 | -0.51095 | -1.80914 |
| H | 3.19484  | -2.48253 | -0.48825 |
| H | 3.78051  | -1.39007 | 0.80089  |
| H | 4.56633  | -1.38451 | -0.80414 |
| H | 2.76444  | 3.62986  | -1.17968 |
| H | 3.34650  | 2.97996  | 0.37994  |
| H | 3.89932  | 2.25480  | -1.16060 |

# 5'-Z

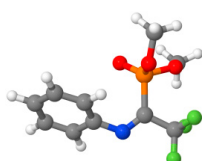

|   |          |         |          |
|---|----------|---------|----------|
| N | -0.64461 | 1.44231 | -0.24804 |
|---|----------|---------|----------|

|   |          |          |          |
|---|----------|----------|----------|
| C | -1.89876 | 0.80760  | -0.11344 |
| C | -2.80735 | 1.34446  | 0.79736  |
| C | -4.05618 | 0.75789  | 0.94084  |
| C | -4.42000 | -0.32416 | 0.14320  |
| C | -3.52565 | -0.82275 | -0.79721 |
| C | -2.26052 | -0.26449 | -0.92801 |
| C | 0.44678  | 0.81502  | -0.19850 |
| P | 0.69338  | -0.96209 | 0.26136  |
| C | 1.71546  | 1.63297  | -0.43378 |
| F | 1.45746  | 2.84200  | -0.90712 |
| F | 2.39674  | 1.78338  | 0.71613  |
| F | 2.52146  | 1.01024  | -1.30007 |
| O | -0.25937 | -1.47903 | 1.25323  |
| O | 0.74408  | -1.64007 | -1.17642 |
| O | 2.22418  | -1.04489 | 0.71468  |
| C | 1.13300  | -3.01967 | -1.28994 |
| C | 2.57400  | -0.99011 | 2.10781  |
| H | -2.51445 | 2.20122  | 1.39142  |
| H | -4.75415 | 1.15620  | 1.66721  |
| H | -5.40222 | -0.76857 | 0.24713  |
| H | -3.81116 | -1.65233 | -1.43265 |
| H | -1.56103 | -0.63942 | -1.66629 |
| H | 1.00708  | -3.28495 | -2.33600 |
| H | 2.17750  | -3.13149 | -0.99748 |
| H | 0.49135  | -3.64289 | -0.66512 |
| H | 2.48617  | 0.03430  | 2.47097  |
| H | 1.92643  | -1.65114 | 2.68324  |
| H | 3.60931  | -1.31494 | 2.17110  |

# 5'-TS

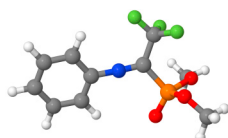

|   |          |          |          |
|---|----------|----------|----------|
| N | 0.91544  | 0.13477  | -0.05906 |
| C | 2.25325  | -0.13002 | -0.02689 |
| C | 2.68579  | -1.39077 | 0.41156  |
| C | 4.04367  | -1.66679 | 0.47075  |
| C | 4.96812  | -0.70989 | 0.05649  |
| C | 4.54035  | 0.53554  | -0.40031 |
| C | 3.18726  | 0.83790  | -0.42559 |
| C | -0.28074 | 0.43568  | -0.07849 |
| P | -1.55737 | -0.89816 | -0.00691 |
| C | -0.76086 | 1.89582  | -0.08368 |
| F | -1.75861 | 2.08708  | -0.94924 |
| F | -1.21361 | 2.24558  | 1.13347  |
| F | 0.23037  | 2.72952  | -0.39779 |
| O | -1.02734 | -2.15565 | 0.54829  |
| O | -2.81679 | -0.29156 | 0.78312  |
| O | -2.10527 | -0.91960 | -1.49900 |
| C | -2.84867 | -0.36945 | 2.21477  |
| C | -3.17267 | -1.81551 | -1.84339 |
| H | 1.93292  | -2.11654 | 0.69771  |



|   |          |          |          |
|---|----------|----------|----------|
| H | 4.38335  | -2.63362 | 0.82152  |
| H | 6.02747  | -0.93574 | 0.08834  |
| H | 5.26495  | 1.27408  | -0.72086 |
| H | 2.82614  | 1.80488  | -0.75379 |
| H | -2.66769 | -1.39431 | 2.53989  |
| H | -3.84052 | -0.04272 | 2.51662  |
| H | -2.09884 | 0.29891  | 2.64352  |
| H | -3.30826 | -1.72920 | -2.91806 |
| H | -2.90287 | -2.83961 | -1.58069 |
| H | -4.08539 | -1.51749 | -1.32555 |

# 6-E

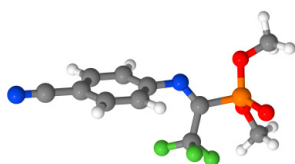

|   |          |          |          |
|---|----------|----------|----------|
| N | -0.10307 | 0.88789  | -0.02692 |
| C | 0.75677  | -0.02895 | -0.09159 |
| P | 2.53953  | 0.39179  | -0.27371 |
| C | 0.45144  | -1.53348 | -0.06428 |
| F | 0.14440  | -1.99528 | -1.27641 |
| F | -0.55215 | -1.82412 | 0.76086  |
| F | 1.53054  | -2.20222 | 0.36565  |
| O | 3.16011  | -0.26305 | -1.43620 |
| O | 2.46818  | 1.96964  | -0.24239 |
| O | 3.21768  | 0.03867  | 1.12779  |
| C | 3.68662  | 2.72117  | -0.35183 |
| C | 4.06505  | -1.10931 | 1.30771  |
| C | -1.49514 | 0.66264  | -0.00006 |
| C | -2.21821 | 1.14148  | 1.09361  |
| C | -3.59135 | 0.97762  | 1.13185  |
| C | -4.25224 | 0.37619  | 0.05626  |
| C | -3.52992 | -0.06312 | -1.05421 |
| C | -2.15108 | 0.07550  | -1.08298 |
| C | -5.67952 | 0.22270  | 0.08982  |
| N | -6.82294 | 0.10030  | 0.11879  |
| H | 4.30401  | 2.55485  | 0.53251  |
| H | 4.22735  | 2.43264  | -1.25438 |
| H | 3.39334  | 3.76554  | -0.40950 |
| H | 4.32245  | -1.54645 | 0.34285  |
| H | 4.96269  | -0.76577 | 1.81801  |
| H | 3.53810  | -1.83519 | 1.92429  |
| H | -1.69121 | 1.62567  | 1.90586  |
| H | -4.16145 | 1.32512  | 1.98408  |
| H | -4.05049 | -0.51543 | -1.88880 |
| H | -1.58313 | -0.25726 | -1.94272 |

# 6-Z

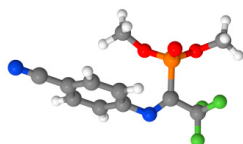

|   |          |          |          |
|---|----------|----------|----------|
| N | -0.21444 | -1.55407 | 0.00108  |
| C | 1.11739  | -1.09499 | 0.04508  |
| C | 1.97103  | -1.43188 | -1.00778 |
| C | 3.29574  | -1.03341 | -0.97052 |
| C | 3.78246  | -0.33101 | 0.13804  |
| C | 2.93372  | -0.02578 | 1.20328  |
| C | 1.59892  | -0.40155 | 1.15728  |
| C | -1.19662 | -0.76702 | 0.02611  |
| P | -1.12821 | 1.08691  | 0.04890  |
| C | -2.58659 | -1.39613 | 0.05035  |
| F | -2.56165 | -2.67673 | 0.37954  |
| F | -3.35002 | -0.74935 | 0.95001  |
| F | -3.18431 | -1.28173 | -1.13833 |
| O | -0.84778 | 1.65538  | 1.37841  |
| O | -0.07188 | 1.36250  | -1.09626 |
| O | -2.50539 | 1.49522  | -0.61767 |
| C | 1.09869  | 2.17942  | -0.91320 |
| C | -3.59357 | 2.08648  | 0.11745  |
| C | 5.15990  | 0.07290  | 0.17934  |
| N | 6.26213  | 0.40085  | 0.20765  |
| H | 1.58056  | -1.99370 | -1.84674 |
| H | 3.96361  | -1.27297 | -1.78840 |
| H | 3.31916  | 0.51029  | 2.06153  |
| H | 0.93036  | -0.15952 | 1.97455  |
| H | 1.96364  | 1.56945  | -1.17103 |
| H | 1.01971  | 3.02958  | -1.58807 |
| H | 1.17000  | 2.51769  | 0.12079  |
| H | -4.44476 | 1.41259  | 0.04864  |
| H | -3.31105 | 2.23968  | 1.15910  |
| H | -3.82395 | 3.03917  | -0.35452 |

## 6-TS

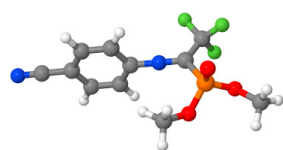

|   |          |          |          |
|---|----------|----------|----------|
| N | -0.19319 | 0.41932  | 0.02956  |
| C | 1.02800  | 0.57036  | 0.05735  |
| C | 1.66635  | 1.97120  | -0.00505 |
| F | 0.77627  | 2.91403  | 0.28248  |
| F | 2.14336  | 2.20625  | -1.22855 |
| F | 2.67585  | 2.05910  | 0.86148  |
| P | 2.12184  | -0.91244 | 0.26112  |
| O | 3.35620  | -0.50350 | -0.63974 |
| C | 4.56925  | -1.27746 | -0.60004 |
| H | 5.30574  | -0.71208 | -1.16355 |
| H | 4.40092  | -2.24733 | -1.06967 |
| H | 4.89548  | -1.40378 | 0.43254  |

|   |          |          |          |
|---|----------|----------|----------|
| O | 1.38227  | -2.02885 | -0.60209 |
| C | 0.41418  | -2.90769 | -0.00084 |
| H | 0.70564  | -3.14450 | 1.02272  |
| H | 0.39881  | -3.80926 | -0.60796 |
| H | -0.56770 | -2.43161 | -0.01704 |
| O | 2.36919  | -1.27579 | 1.66464  |
| C | -1.53199 | 0.28236  | 0.00268  |
| C | -2.19943 | 0.14309  | -1.22746 |
| C | -2.25736 | 0.24558  | 1.20738  |
| C | -3.57054 | -0.02635 | -1.24166 |
| C | -3.62761 | 0.07595  | 1.17045  |
| C | -4.29854 | -0.06237 | -0.04874 |
| H | -1.63161 | 0.17137  | -2.14801 |
| H | -1.73351 | 0.35154  | 2.14813  |
| H | -4.08819 | -0.13205 | -2.18701 |
| H | -4.18964 | 0.04906  | 2.09576  |
| C | -5.71967 | -0.24229 | -0.07544 |
| N | -6.86111 | -0.38907 | -0.09750 |

# 7-E

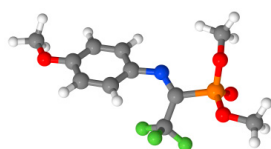

|   |          |          |          |
|---|----------|----------|----------|
| N | 0.03169  | 0.69006  | -0.03593 |
| C | -1.34702 | 0.40512  | -0.11549 |
| C | -2.21107 | 1.27558  | 0.54052  |
| C | -3.58734 | 1.08355  | 0.49505  |
| C | -4.10922 | 0.04094  | -0.27092 |
| C | -3.24513 | -0.80138 | -0.97897 |
| C | -1.87841 | -0.62902 | -0.89684 |
| C | 0.96104  | -0.15342 | 0.11201  |
| P | 2.65471  | 0.54920  | 0.16631  |
| C | 0.82061  | -1.65701 | 0.36833  |
| F | -0.27459 | -1.95377 | 1.06780  |
| F | 0.77775  | -2.35099 | -0.77787 |
| F | 1.87074  | -2.09657 | 1.06426  |
| O | 3.18051  | 0.79530  | 1.51929  |
| O | 3.42599  | -0.49946 | -0.74421 |
| O | 2.59474  | 1.83801  | -0.76836 |
| C | 4.86003  | -0.46848 | -0.79888 |
| C | 2.24642  | 3.12106  | -0.22713 |
| O | -5.43021 | -0.22299 | -0.40441 |
| C | -6.34333 | 0.60715  | 0.28477  |
| H | -1.79208 | 2.09714  | 1.10891  |
| H | -4.23341 | 1.75859  | 1.03889  |
| H | -3.67565 | -1.58619 | -1.58803 |
| H | -1.22004 | -1.27920 | -1.45941 |
| H | 5.16268  | -1.35427 | -1.35057 |
| H | 5.19087  | 0.42924  | -1.32359 |
| H | 5.27260  | -0.49156 | 0.21043  |
| H | 1.16095  | 3.21088  | -0.19492 |

|   |          |         |          |
|---|----------|---------|----------|
| H | 2.66942  | 3.23552 | 0.77178  |
| H | 2.66764  | 3.86355 | -0.90089 |
| H | -6.26458 | 1.64491 | -0.05310 |
| H | -6.18017 | 0.55954 | 1.36565  |
| H | -7.33347 | 0.22401 | 0.05053  |

## 7-Z

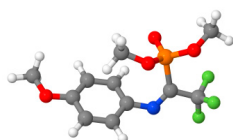

|   |          |          |          |
|---|----------|----------|----------|
| N | 0.35087  | -1.56803 | 0.01024  |
| C | -0.99278 | -1.13154 | 0.02700  |
| C | -1.83075 | -1.59178 | 1.04939  |
| C | -3.15930 | -1.21824 | 1.07546  |
| C | -3.69117 | -0.42466 | 0.05042  |
| C | -2.87070 | -0.00305 | -0.99258 |
| C | -1.51974 | -0.35037 | -0.99560 |
| C | 1.31417  | -0.75872 | -0.06148 |
| P | 1.22567  | 1.09284  | 0.00338  |
| C | 2.71024  | -1.36352 | -0.17076 |
| F | 2.68789  | -2.63497 | -0.53952 |
| F | 3.42349  | -0.68162 | -1.08843 |
| F | 3.37171  | -1.28172 | 0.98757  |
| O | 0.85429  | 1.74814  | -1.26367 |
| O | 0.27195  | 1.32332  | 1.24657  |
| O | 2.64995  | 1.47214  | 0.59172  |
| C | -0.97101 | 2.04048  | 1.17432  |
| C | 3.67121  | 2.12134  | -0.18437 |
| O | -5.01067 | -0.13147 | 0.15703  |
| C | -5.59422 | 0.65298  | -0.86350 |
| H | -1.41836 | -2.22846 | 1.82244  |
| H | -3.82007 | -1.54529 | 1.86858  |
| H | -3.25776 | 0.59277  | -1.80777 |
| H | -0.88269 | -0.01956 | -1.80725 |
| H | -1.77367 | 1.34215  | 1.40971  |
| H | -0.92918 | 2.83719  | 1.91482  |
| H | -1.11458 | 2.45521  | 0.17616  |
| H | 4.53870  | 1.46499  | -0.20637 |
| H | 3.31626  | 2.31681  | -1.19651 |
| H | 3.91632  | 3.05709  | 0.31427  |
| H | -6.64035 | 0.77072  | -0.59162 |
| H | -5.52356 | 0.15273  | -1.83407 |
| H | -5.11999 | 1.63748  | -0.92426 |

## 7-TS

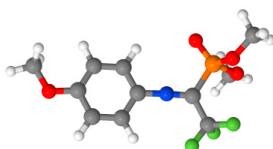

|   |          |          |          |
|---|----------|----------|----------|
| N | 0.20565  | 0.32841  | -0.09525 |
| C | -1.02232 | 0.47545  | -0.10380 |
| C | -1.68304 | 1.85983  | -0.11294 |
| F | -0.81812 | 2.80689  | -0.48067 |
| F | -2.12714 | 2.17941  | 1.11745  |
| F | -2.73289 | 1.91172  | -0.93594 |
| P | -2.10567 | -1.01069 | 0.00099  |
| O | -2.76322 | -1.07550 | -1.44631 |
| C | -3.73866 | -2.08874 | -1.72913 |
| H | -3.96625 | -2.00626 | -2.78856 |
| H | -4.63798 | -1.91023 | -1.13800 |
| H | -3.32969 | -3.07646 | -1.50982 |
| O | -3.37464 | -0.59838 | 0.89766  |
| C | -3.26596 | -0.66784 | 2.32487  |
| H | -2.92183 | -1.65709 | 2.62854  |
| H | -4.26052 | -0.47303 | 2.71821  |
| H | -2.57546 | 0.09747  | 2.68701  |
| O | -1.38005 | -2.20430 | 0.47204  |
| C | 1.56008  | 0.24491  | -0.08198 |
| C | 2.16660  | -1.00163 | 0.12336  |
| C | 2.37066  | 1.38350  | -0.26407 |
| C | 3.54752  | -1.12248 | 0.15601  |
| C | 3.74220  | 1.26822  | -0.24978 |
| C | 4.33834  | 0.01555  | -0.03622 |
| H | 1.51985  | -1.86094 | 0.26325  |
| H | 1.89052  | 2.34188  | -0.42084 |
| H | 3.99412  | -2.09265 | 0.32350  |
| H | 4.38836  | 2.12480  | -0.39433 |
| O | 5.68597  | 0.00790  | -0.03304 |
| C | 6.35002  | -1.22578 | 0.17148  |
| H | 6.10007  | -1.64813 | 1.14876  |
| H | 6.09752  | -1.94162 | -0.61573 |
| H | 7.41304  | -1.00210 | 0.13286  |

# 8-E

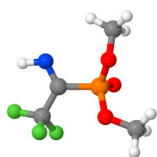

|   |          |          |          |
|---|----------|----------|----------|
| N | -0.61024 | -2.04384 | -0.24099 |
| C | -0.65754 | -0.79852 | -0.06136 |
| P | 0.93126  | 0.06675  | 0.25283  |
| C | -1.95733 | 0.00364  | -0.01913 |
| F | -1.96725 | 0.84417  | 1.01305  |
| F | -2.11742 | 0.71024  | -1.13754 |
| F | -3.01257 | -0.81185 | 0.09752  |
| O | 1.30799  | 0.12083  | 1.67310  |
| O | 0.65186  | 1.43914  | -0.49033 |
| O | 1.98241  | -0.65137 | -0.69983 |
| C | 1.57628  | 2.52947  | -0.34513 |
| C | 2.72091  | -1.79835 | -0.24203 |

|   |          |          |          |
|---|----------|----------|----------|
| H | -1.54565 | -2.45100 | -0.33565 |
| H | 2.51132  | 2.28983  | -0.85344 |
| H | 1.75700  | 2.72632  | 0.71212  |
| H | 1.10675  | 3.38921  | -0.81468 |
| H | 2.09479  | -2.68540 | -0.33100 |
| H | 3.58939  | -1.87902 | -0.89082 |
| H | 3.03232  | -1.65371 | 0.79291  |

### 8-Z

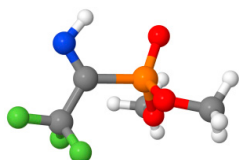

|   |          |          |          |
|---|----------|----------|----------|
| N | 1.18100  | 0.09518  | -2.02767 |
| C | 0.78546  | -0.05925 | -0.84327 |
| C | 1.82340  | -0.24037 | 0.25623  |
| P | -0.99767 | 0.05357  | -0.40674 |
| F | 3.01540  | -0.56370 | -0.21799 |
| F | 1.94614  | 0.91195  | 0.93899  |
| F | 1.44560  | -1.18006 | 1.12634  |
| O | -1.75532 | 0.55737  | -1.56432 |
| O | -1.31400 | -1.39690 | 0.13558  |
| O | -1.09266 | 0.93388  | 0.92050  |
| C | -2.61041 | -1.69884 | 0.68046  |
| C | -1.03649 | 2.36674  | 0.82230  |
| H | 0.37835  | 0.26334  | -2.64539 |
| H | -2.60679 | -2.76397 | 0.89303  |
| H | -3.38685 | -1.46412 | -0.04894 |
| H | -2.76244 | -1.13181 | 1.59924  |
| H | -1.25799 | 2.74787  | 1.81533  |
| H | -0.03301 | 2.67911  | 0.52550  |
| H | -1.77337 | 2.72168  | 0.10162  |

### 8-TS

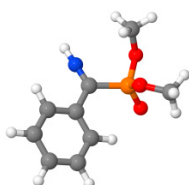

|   |          |          |          |
|---|----------|----------|----------|
| N | -0.77258 | -2.13666 | -0.27547 |
| C | -0.69255 | -0.93514 | -0.04240 |
| C | -1.94474 | -0.04042 | -0.01218 |
| P | 0.92550  | -0.06992 | 0.29183  |
| F | -3.02979 | -0.73677 | 0.29104  |
| F | -1.80631 | 0.95061  | 0.87540  |
| F | -2.13270 | 0.52019  | -1.21262 |
| O | 1.17833  | 0.34170  | 1.68754  |
| O | 1.91453  | -1.15626 | -0.33873 |
| O | 1.02301  | 1.12441  | -0.78093 |
| C | 3.30599  | -0.85150 | -0.30058 |

|   |          |          |          |
|---|----------|----------|----------|
| C | 0.81320  | 2.47727  | -0.37252 |
| H | -0.86350 | -3.10990 | -0.45716 |
| H | 3.79504  | -1.51327 | -1.01891 |
| H | 3.70216  | -1.02737 | 0.70588  |
| H | 3.48968  | 0.19124  | -0.58913 |
| H | 1.26263  | 3.10667  | -1.14466 |
| H | -0.25421 | 2.70373  | -0.29940 |
| H | 1.29455  | 2.66819  | 0.59296  |

# 9-E

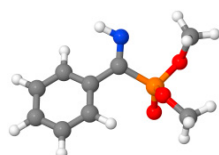

|   |          |          |          |
|---|----------|----------|----------|
| N | 0.30427  | 2.07420  | 0.55641  |
| C | -0.04916 | 0.92715  | 0.14203  |
| P | 1.31376  | -0.13074 | -0.49320 |
| C | -1.43783 | 0.39438  | 0.09882  |
| C | -1.68852 | -0.97103 | 0.24807  |
| C | -2.99485 | -1.44411 | 0.24293  |
| C | -4.05730 | -0.56415 | 0.06745  |
| O | 1.02387  | -0.86817 | -1.73019 |
| O | 1.57578  | -1.05219 | 0.80509  |
| O | 2.60084  | 0.79374  | -0.61433 |
| C | 2.43295  | -2.19324 | 0.65636  |
| C | 3.26550  | 1.42467  | 0.48811  |
| C | -3.81236 | 0.79508  | -0.10576 |
| C | -2.50895 | 1.27177  | -0.08982 |
| H | -0.50125 | 2.60170  | 0.90486  |
| H | -0.86412 | -1.66182 | 0.37764  |
| H | -3.18214 | -2.50346 | 0.36872  |
| H | -5.07427 | -0.93752 | 0.05324  |
| H | 3.45710  | -1.87341 | 0.44983  |
| H | 2.07650  | -2.82683 | -0.15721 |
| H | 2.39824  | -2.73112 | 1.60055  |
| H | 3.05953  | 0.89534  | 1.42037  |
| H | 4.33138  | 1.38940  | 0.26835  |
| H | 2.91864  | 2.45191  | 0.56692  |
| H | -4.63552 | 1.48074  | -0.26596 |
| H | -2.32103 | 2.32678  | -0.25793 |

# 9-Z

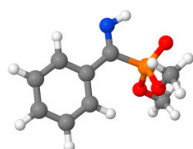

|   |          |         |          |
|---|----------|---------|----------|
| N | -0.02082 | 2.23291 | -0.86882 |
| C | -0.06460 | 1.02712 | -0.47193 |
| P | 1.55037  | 0.20229 | -0.15554 |

|   |          |          |          |
|---|----------|----------|----------|
| C | -1.36243 | 0.34494  | -0.22460 |
| C | -1.43516 | -0.97743 | 0.21834  |
| C | -2.67345 | -1.57218 | 0.44183  |
| C | -3.84302 | -0.85540 | 0.22396  |
| O | 2.67525  | 1.12065  | -0.41680 |
| O | 1.48930  | -1.13775 | -1.00966 |
| O | 1.50443  | -0.37769 | 1.34259  |
| C | 2.66995  | -1.94975 | -1.11999 |
| C | 1.66968  | 0.54111  | 2.43090  |
| C | -3.77577 | 0.46445  | -0.22034 |
| C | -2.54524 | 1.06128  | -0.44286 |
| H | 0.94926  | 2.54258  | -0.97648 |
| H | -0.53283 | -1.55026 | 0.38911  |
| H | -2.72045 | -2.59852 | 0.78518  |
| H | -4.80586 | -1.32121 | 0.39803  |
| H | 2.89678  | -2.40514 | -0.15478 |
| H | 3.51046  | -1.34295 | -1.45897 |
| H | 2.44222  | -2.71961 | -1.85214 |
| H | 0.81499  | 1.22117  | 2.48096  |
| H | 1.71185  | -0.05779 | 3.33691  |
| H | 2.59246  | 1.10909  | 2.30693  |
| H | -4.68611 | 1.02609  | -0.39265 |
| H | -2.47414 | 2.08515  | -0.78810 |

## 9-TS

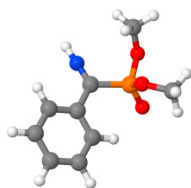

|   |          |          |          |
|---|----------|----------|----------|
| N | 0.26426  | 2.20445  | -0.29294 |
| C | -0.01542 | 0.99975  | -0.28519 |
| P | 1.37403  | -0.23863 | -0.46407 |
| C | -1.39880 | 0.44626  | -0.11811 |
| C | -1.71196 | -0.86608 | -0.47737 |
| C | -3.01142 | -1.33681 | -0.31721 |
| C | -3.99607 | -0.50963 | 0.21024  |
| O | 1.32570  | -1.17003 | -1.60393 |
| O | 1.32220  | -0.93605 | 0.98782  |
| O | 2.71465  | 0.63092  | -0.45911 |
| C | 2.01998  | -2.17313 | 1.18407  |
| C | 3.13169  | 1.42296  | 0.65392  |
| C | -3.68501 | 0.79988  | 0.57235  |
| C | -2.39345 | 1.27548  | 0.40407  |
| H | 0.48535  | 3.17042  | -0.34514 |
| H | -0.95487 | -1.51150 | -0.90868 |
| H | -3.25351 | -2.35152 | -0.60925 |
| H | -5.00565 | -0.88193 | 0.33871  |
| H | 3.09903  | -2.01558 | 1.11595  |
| H | 1.70962  | -2.90196 | 0.43438  |
| H | 1.75924  | -2.51981 | 2.18094  |
| H | 2.46012  | 1.30554  | 1.50632  |



|   |          |         |         |
|---|----------|---------|---------|
| H | 4.13435  | 1.10034 | 0.93522 |
| H | 3.15296  | 2.46629 | 0.34253 |
| H | -4.45066 | 1.44539 | 0.98599 |
| H | -2.13394 | 2.29200 | 0.67579 |

# 10-E

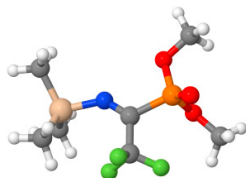

|    |          |          |          |
|----|----------|----------|----------|
| N  | -0.88482 | -0.70726 | 0.01331  |
| C  | 0.04561  | 0.11239  | -0.11081 |
| C  | -0.16683 | 1.63260  | -0.20398 |
| P  | 1.80787  | -0.41926 | -0.27413 |
| F  | -1.10513 | 2.03519  | 0.66339  |
| F  | 0.95794  | 2.29993  | 0.08544  |
| F  | -0.55975 | 1.99994  | -1.42341 |
| O  | 2.46176  | 0.05503  | -1.50706 |
| O  | 2.54062  | 0.04627  | 1.07296  |
| O  | 1.66488  | -1.98247 | -0.06435 |
| C  | 3.45609  | 1.15190  | 1.10426  |
| C  | 2.84493  | -2.79248 | -0.14095 |
| Si | -2.66312 | -0.62673 | 0.14232  |
| C  | -3.01724 | -0.35773 | 1.95719  |
| C  | -3.23905 | -2.30773 | -0.42659 |
| C  | -3.41344 | 0.69687  | -0.94943 |
| H  | 4.34186  | 0.81966  | 1.64281  |
| H  | 2.98577  | 1.97899  | 1.63369  |
| H  | 3.72270  | 1.45452  | 0.09131  |
| H  | 2.51187  | -3.82373 | -0.06149 |
| H  | 3.35070  | -2.63386 | -1.09470 |
| H  | 3.51453  | -2.55332 | 0.68749  |
| H  | -2.67718 | 0.62711  | 2.28250  |
| H  | -2.51695 | -1.11464 | 2.56520  |
| H  | -4.09155 | -0.42905 | 2.14663  |
| H  | -2.78461 | -3.09354 | 0.18038  |
| H  | -2.95706 | -2.48383 | -1.46743 |
| H  | -4.32584 | -2.39766 | -0.35175 |
| H  | -3.02941 | 0.62670  | -1.97019 |
| H  | -3.22500 | 1.70660  | -0.58369 |
| H  | -4.49645 | 0.54881  | -0.99389 |

# 10-Z

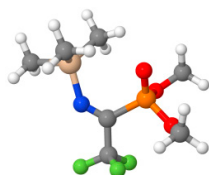

|   |          |         |          |
|---|----------|---------|----------|
| N | 1.08162  | 1.01627 | -0.09398 |
| C | -0.14169 | 0.77664 | -0.12318 |

|    |          |          |          |
|----|----------|----------|----------|
| C  | -1.13468 | 1.91993  | -0.36156 |
| P  | -0.87357 | -0.90331 | 0.14351  |
| F  | -0.53475 | 3.06587  | -0.63635 |
| F  | -1.96012 | 1.62407  | -1.37235 |
| F  | -1.89479 | 2.10541  | 0.73513  |
| O  | -0.14716 | -1.68063 | 1.16667  |
| O  | -2.43398 | -0.72594 | 0.42998  |
| O  | -0.85502 | -1.46438 | -1.34299 |
| C  | -2.92644 | -0.67278 | 1.77939  |
| C  | -1.22045 | -2.83255 | -1.58255 |
| Si | 2.54200  | 0.00434  | 0.15705  |
| C  | 2.71572  | -0.21072 | 2.00139  |
| C  | 3.92066  | 1.04561  | -0.55242 |
| C  | 2.43376  | -1.61510 | -0.77812 |
| H  | -2.69494 | 0.29736  | 2.22000  |
| H  | -2.48319 | -1.47305 | 2.37182  |
| H  | -4.00388 | -0.79810 | 1.71150  |
| H  | -1.06654 | -3.00683 | -2.64391 |
| H  | -0.58457 | -3.49686 | -0.99530 |
| H  | -2.27005 | -2.98693 | -1.32757 |
| H  | 1.89802  | -0.82563 | 2.38146  |
| H  | 2.70450  | 0.75573  | 2.51048  |
| H  | 3.66383  | -0.70279 | 2.23478  |
| H  | 3.96516  | 2.01700  | -0.05522 |
| H  | 3.76671  | 1.22302  | -1.61964 |
| H  | 4.88802  | 0.55163  | -0.42885 |
| H  | 2.01722  | -1.46569 | -1.77773 |
| H  | 1.81926  | -2.34139 | -0.24512 |
| H  | 3.43947  | -2.02917 | -0.89483 |

## 10-TS

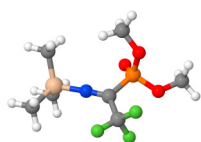

|    |          |          |          |
|----|----------|----------|----------|
| N  | -1.04542 | 0.12266  | 0.06071  |
| C  | 0.12992  | 0.50066  | 0.02995  |
| C  | 0.51590  | 1.95852  | -0.27951 |
| P  | 1.46004  | -0.75310 | 0.30455  |
| F  | 1.04401  | 2.54978  | 0.79660  |
| F  | 1.41773  | 2.01429  | -1.26557 |
| F  | -0.54725 | 2.66664  | -0.65405 |
| O  | 1.08525  | -1.80934 | 1.25782  |
| O  | 1.80358  | -1.30019 | -1.16616 |
| O  | 2.72609  | 0.14750  | 0.62151  |
| C  | 1.01676  | -2.36592 | -1.71248 |
| C  | 4.01106  | -0.45996 | 0.82320  |
| Si | -2.71241 | -0.34499 | 0.18696  |
| C  | -2.90682 | -1.88183 | -0.86060 |
| C  | -3.84154 | 1.01282  | -0.42558 |
| C  | -2.95083 | -0.68020 | 2.00675  |
| H  | 0.02315  | -1.99728 | -1.97944 |
| H  | 0.92855  | -3.17820 | -0.99014 |

|   |          |          |          |
|---|----------|----------|----------|
| H | 1.53437  | -2.70463 | -2.60658 |
| H | 4.68076  | 0.33922  | 1.12845  |
| H | 3.94818  | -1.21710 | 1.60611  |
| H | 4.35795  | -0.90462 | -0.11038 |
| H | -2.24441 | -2.67311 | -0.50188 |
| H | -2.67310 | -1.67924 | -1.90902 |
| H | -3.93577 | -2.24897 | -0.81827 |
| H | -3.63645 | 1.24791  | -1.47284 |
| H | -3.69688 | 1.92677  | 0.15519  |
| H | -4.89218 | 0.72018  | -0.34474 |
| H | -2.78488 | 0.22409  | 2.59639  |
| H | -2.24665 | -1.44337 | 2.34456  |
| H | -3.96818 | -1.02842 | 2.20332  |

# 11-E

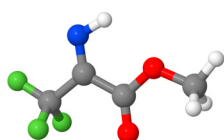

|   |          |          |          |
|---|----------|----------|----------|
| C | 1.51622  | -0.11407 | 0.00001  |
| F | 2.56540  | 0.69578  | -0.00023 |
| F | 1.59478  | -0.89383 | 1.08230  |
| F | 1.59449  | -0.89412 | -1.08211 |
| C | 0.20712  | 0.66872  | 0.00008  |
| C | -1.04830 | -0.18714 | 0.00004  |
| O | -1.04093 | -1.38233 | -0.00004 |
| O | -2.13956 | 0.57679  | 0.00014  |
| C | -3.38517 | -0.13445 | -0.00006 |
| N | 0.24150  | 1.92390  | -0.00006 |
| H | -4.15808 | 0.62806  | -0.00145 |
| H | -3.45522 | -0.75867 | 0.89018  |
| H | -3.45387 | -0.76064 | -0.88900 |
| H | -0.71057 | 2.29929  | -0.00016 |

# 11-Z

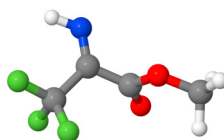

|   |          |          |          |
|---|----------|----------|----------|
| C | 1.48509  | -0.15349 | -0.00006 |
| F | 2.55301  | 0.65752  | -0.00004 |
| F | 1.56670  | -0.92364 | 1.08184  |
| F | 1.56661  | -0.92345 | -1.08209 |
| C | 0.19939  | 0.67778  | 0.00008  |
| C | -1.07327 | -0.14647 | 0.00045  |
| O | -1.05513 | -1.34605 | 0.00017  |
| O | -2.15803 | 0.60758  | 0.00005  |
| C | -3.39635 | -0.11245 | -0.00028 |
| N | 0.17418  | 1.93339  | 0.00011  |
| H | -4.17303 | 0.64619  | -0.00114 |

|   |          |          |          |
|---|----------|----------|----------|
| H | -3.46487 | -0.73871 | 0.88909  |
| H | -3.46385 | -0.73972 | -0.88901 |
| H | 1.12174  | 2.32023  | -0.00005 |

### 11-TS

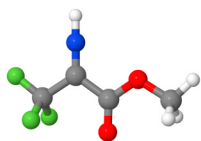

|   |          |          |          |
|---|----------|----------|----------|
| C | 1.50266  | -0.14524 | 0.00009  |
| F | 2.57295  | 0.64463  | 0.00043  |
| F | 1.56885  | -0.92353 | 1.08348  |
| F | 1.56944  | -0.92339 | -1.08336 |
| C | 0.20616  | 0.70136  | -0.00017 |
| C | -1.06650 | -0.15892 | -0.00019 |
| O | -1.04376 | -1.35699 | -0.00056 |
| O | -2.16108 | 0.58911  | 0.00026  |
| C | -3.39170 | -0.14265 | 0.00024  |
| N | 0.22480  | 1.92223  | -0.00035 |
| H | -4.17803 | 0.60629  | 0.00097  |
| H | -3.45318 | -0.77142 | 0.88846  |
| H | -3.45379 | -0.77031 | -0.88872 |
| H | 0.24516  | 2.91610  | -0.00057 |

### 12-E

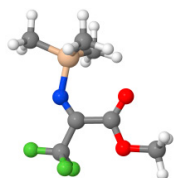

|    |          |          |          |
|----|----------|----------|----------|
| C  | 1.63340  | -1.41196 | 0.00007  |
| F  | 1.17275  | -2.65442 | 0.00089  |
| F  | 2.40896  | -1.26551 | -1.08324 |
| F  | 2.40964  | -1.26433 | 1.08276  |
| C  | 0.48750  | -0.38747 | -0.00005 |
| C  | 0.88994  | 1.08875  | 0.00067  |
| O  | 0.07680  | 1.97161  | 0.00315  |
| O  | 2.20180  | 1.26323  | -0.00175 |
| C  | 2.65065  | 2.62409  | -0.00090 |
| N  | -0.69120 | -0.78892 | -0.00035 |
| C  | -2.49716 | 1.00400  | 1.57471  |
| C  | -3.49873 | -1.40861 | -0.00420 |
| C  | -2.49556 | 1.01085  | -1.57110 |
| Si | -2.29096 | 0.01754  | -0.00022 |
| H  | 3.73507  | 2.57313  | -0.00174 |
| H  | 2.28500  | 3.13488  | 0.88950  |
| H  | 2.28376  | 3.13636  | -0.88996 |
| H  | -1.88834 | 1.90759  | 1.56998  |
| H  | -2.22635 | 0.40033  | 2.44478  |
| H  | -3.54661 | 1.29012  | 1.68884  |

|   |          |          |          |
|---|----------|----------|----------|
| H | -3.35774 | -2.03975 | 0.87644  |
| H | -3.35681 | -2.03562 | -0.88766 |
| H | -4.53193 | -1.05102 | -0.00396 |
| H | -2.21861 | 0.41276  | -2.44311 |
| H | -1.89092 | 1.91716  | -1.55972 |
| H | -3.54589 | 1.29261  | -1.68791 |

## 12-Z

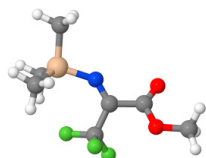

|    |          |          |          |
|----|----------|----------|----------|
| C  | 0.67738  | 1.32432  | 0.11416  |
| F  | 0.96657  | 1.78980  | -1.10298 |
| F  | -0.46605 | 1.90384  | 0.50292  |
| F  | 1.63112  | 1.73131  | 0.95610  |
| C  | 0.53226  | -0.20812 | 0.12507  |
| C  | 1.84433  | -0.99045 | 0.19966  |
| O  | 1.96010  | -2.05535 | 0.72640  |
| O  | 2.81781  | -0.33333 | -0.43226 |
| C  | 4.09535  | -0.97958 | -0.43732 |
| N  | -0.54921 | -0.82106 | 0.07240  |
| C  | -2.86964 | 0.15468  | 1.59741  |
| C  | -3.08802 | -2.04205 | -0.53642 |
| C  | -2.56066 | 0.82132  | -1.45045 |
| Si | -2.28012 | -0.42305 | -0.07922 |
| H  | 4.75835  | -0.31603 | -0.98442 |
| H  | 4.02116  | -1.94880 | -0.93009 |
| H  | 4.44421  | -1.12056 | 0.58555  |
| H  | -2.44564 | 1.12315  | 1.86552  |
| H  | -2.59591 | -0.56916 | 2.36867  |
| H  | -3.95936 | 0.24413  | 1.59702  |
| H  | -2.88507 | -2.79996 | 0.22339  |
| H  | -2.70303 | -2.41434 | -1.48883 |
| H  | -4.17141 | -1.93014 | -0.63032 |
| H  | -2.02723 | 0.52055  | -2.35625 |
| H  | -2.23839 | 1.82738  | -1.18163 |
| H  | -3.62566 | 0.85820  | -1.69657 |

## 12-TS

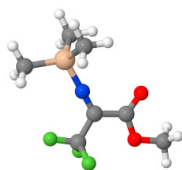

|   |          |          |          |
|---|----------|----------|----------|
| C | -1.13393 | -1.50747 | 0.00000  |
| F | -0.17673 | -2.43277 | -0.00000 |
| F | -1.89348 | -1.71128 | 1.08291  |
| F | -1.89349 | -1.71128 | -1.08290 |

|    |          |          |          |
|----|----------|----------|----------|
| C  | -0.51743 | -0.09350 | 0.00000  |
| C  | -1.48967 | 1.09628  | 0.00000  |
| O  | -1.12102 | 2.23375  | 0.00002  |
| O  | -2.75890 | 0.70006  | -0.00001 |
| C  | -3.73512 | 1.74708  | -0.00001 |
| N  | 0.70120  | 0.08017  | 0.00000  |
| C  | 2.79404  | 1.26857  | 1.55664  |
| C  | 2.79403  | 1.26859  | -1.55664 |
| C  | 3.30989  | -1.33829 | -0.00002 |
| Si | 2.42080  | 0.30638  | -0.00000 |
| H  | -4.69992 | 1.24888  | 0.00000  |
| H  | -3.61679 | 2.36612  | -0.88916 |
| H  | -3.61677 | 2.36613  | 0.88914  |
| H  | 2.48459  | 0.71335  | 2.44513  |
| H  | 2.26759  | 2.22501  | 1.54913  |
| H  | 3.86685  | 1.46139  | 1.64027  |
| H  | 2.26759  | 2.22503  | -1.54910 |
| H  | 2.48455  | 0.71339  | -2.44513 |
| H  | 3.86684  | 1.46140  | -1.64028 |
| H  | 3.04130  | -1.92420 | -0.88233 |
| H  | 3.04134  | -1.92420 | 0.88230  |
| H  | 4.39507  | -1.20287 | -0.00004 |
